# Supplementary material for: Proteomic Analysis of Morphologically Changed Tissues after Prolonged Dexamethasone Treatment
Source: MDPI journal article supplement (doi:10.3390/ijms20133122), 2019-06-26
Supplement: s1 [file s1]

| Table S3     | Name                | p-value range       | # Molecules |                                                                                                                                                           |                                                                                                                                               |                                                                                                                                              |                                                                                                                              |
|--------------|---------------------|---------------------|-------------|-----------------------------------------------------------------------------------------------------------------------------------------------------------|-----------------------------------------------------------------------------------------------------------------------------------------------|----------------------------------------------------------------------------------------------------------------------------------------------|------------------------------------------------------------------------------------------------------------------------------|
| <b>Brain</b> |                     |                     |             |                                                                                                                                                           |                                                                                                                                               |                                                                                                                                              |                                                                                                                              |
| 1            | Cellular Compromise | 4.22E-03 - 1.57E-10 | 42          | ALDOC<br>AP2A2<br>ATP1B2<br>ATP6V0A1<br>C3<br>CES1<br>COTL1<br>CP<br>CTSC<br>GPI<br>GRN                                                                   | GSTP1<br>GZMB<br>HP<br>HPX<br>IDH1<br>KRT18<br>MAPT<br>MECP2<br>MGST1<br>MOG<br>MSN                                                           | NEFL<br>Nefm<br>PAFAH1B2<br>PDXK<br>PLP1<br>PNP<br>PPP2CA<br>PPT1<br>PRDX6<br>PSMB1<br>PYGL                                                  | RAB3A<br>RAB7A<br>RALA<br>RAP1B<br>RNLS<br>SLC1A3<br>STAMBP<br>TFAM<br>VCP                                                   |
| 2            | Molecular Transport | 5.37E-03 - 2.37E-09 | 65          | ACADM<br>AKR1B1<br>ALDH1A1<br>AP2A2<br>AP2M1<br>ATP1B2<br>ATP2B2<br>ATP5F1B<br>ATP6V0A1<br>BCAT2<br>C3<br>CA1<br>CACNA2D3<br>CES1<br>CLTRN<br>CP<br>CPLX1 | DBI<br>DDX39B<br>EIF2D<br>EPHX1<br>GAD2<br>GAPDH<br>GAPDHS<br>GGT1<br>GSR<br>H2AFY<br>HADH<br>HNRNPA2B1<br>HP<br>HPX<br>IDH1<br>LETM1<br>LMNA | LRRC8A<br>LRRC8C<br>MAPT<br>MECP2<br>MSN<br>NAPA<br>PCK1<br>PDCD6<br>PHAX<br>PHB<br>PNP<br>PPT1<br>PRDX2<br>PRDX6<br>RAB34<br>RAB3A<br>RAB3C | RAB4A<br>RAB7A<br>RALA<br>S100B<br>SCARB1<br>SEC22B<br>SLC1A3<br>SLC25A4<br>STX1A<br>SV2A<br>SYN2<br>TOMM40<br>TPT1<br>VPS45 |
| 3            | Cell Morphology     | 4.96E-03 - 4.78E-09 | 51          | AP2M1<br>ATP1B2<br>ATP2B2<br>C1QBP<br>C3<br>CACNA2D3                                                                                                      | GRN<br>HNRNPA2B1<br>KLK8<br>KRT18<br>LETM1<br>LMNA                                                                                            | NEFL<br>Nefm<br>PCK1<br>PLP1<br>PPP2CA<br>PPT1                                                                                               | S100B<br>SLC1A3<br>STIP1<br>STX1A<br>SV2A<br>SYN2                                                                            |

|              |                                   |                        |    |                                                                                                                                                                                                       |                                                                                                                                                                                              |                                                                                                                                                                                             |                                                                                                                                                                         |
|--------------|-----------------------------------|------------------------|----|-------------------------------------------------------------------------------------------------------------------------------------------------------------------------------------------------------|----------------------------------------------------------------------------------------------------------------------------------------------------------------------------------------------|---------------------------------------------------------------------------------------------------------------------------------------------------------------------------------------------|-------------------------------------------------------------------------------------------------------------------------------------------------------------------------|
|              |                                   |                        |    | CAPZB<br>CEP83<br>CES1<br>CP<br>CPLX1<br>CSRP1<br>GAPDH<br>GDI1                                                                                                                                       | LYPLA1<br>MAPT<br>MECP2<br>MOG<br>MSN<br>MUSK<br>MYBPC3<br>MYH6                                                                                                                              | RAB35<br>RAB3A<br>RAB4A<br>RAB7A<br>RALA<br>RAP1B<br>RIPOR2<br>RPS14                                                                                                                        | TFAM<br>VCP<br>Wasl                                                                                                                                                     |
| <b>Heart</b> |                                   |                        |    |                                                                                                                                                                                                       |                                                                                                                                                                                              |                                                                                                                                                                                             |                                                                                                                                                                         |
| 1            | Amino Acid<br>Metabolism          | 4.25E-03 -<br>1.29E-12 | 21 | ARG1<br>ASPA<br>ASS1<br>BAAT<br>BHMT<br>BHMT2                                                                                                                                                         | CKMT2<br>CPS1<br>CTH<br>DDAH2<br>FABP3<br>GLYAT                                                                                                                                              | Gnmt<br>GSN<br>GSTZ1<br>MAT1A<br>NIT2<br>STX1A                                                                                                                                              | SYN1<br>SYN2<br>UPB1                                                                                                                                                    |
| 2            | Small<br>Molecule<br>Biochemistry | 7.96E-03 -<br>1.29E-12 | 86 | A2M<br>ABCC2<br>ACAA2<br>Acot1<br>ACOT7<br>ACOX1<br>ADH1C<br>Akr1c14<br>AKR7A3<br>Aldh1a7<br>ALDOB<br>AMACR<br>ANXA1<br>ARG1<br>ASPA<br>ASS1<br>ATP2B2<br>ATP5F1D<br>ATP5PF<br>ATP5PO<br>BAAT<br>BDH2 | BHMT<br>BHMT2<br>CALCB<br>Calm1<br>CAT<br>CES1<br>CISD1<br>CKMT2<br>CMPK1<br>CPLX2<br>CPS1<br>CSRP3<br>CTH<br>CYB5A<br>Cyp2c23<br>CYP2C9<br>CYP4A22<br>DAB2<br>DBI<br>DDAH2<br>DECR2<br>DPYS | EPHX1<br>FABP1<br>FABP3<br>FBP1<br>GLYAT<br>GMFB<br>Gnmt<br>GPD1<br>GSN<br>GSTM1<br>GSTM2<br>GSTM5<br>GSTZ1<br>HSD11B1<br>Hsd3b4<br>HSPA5<br>IDH1<br>MAPK1<br>MAT1A<br>MIF<br>MYH9<br>NAPRT | NIT2<br>OCRL<br>PAFAH1B2<br>PGM1<br>PGR<br>PLCB1<br>PNP<br>RALA<br>RGN<br>RPSA<br>SACM1L<br>SNCG<br>SOD1<br>SORD<br>STX1A<br>Sult1a1<br>SYN1<br>SYN2<br>UGT2B15<br>UPB1 |
| 3            | Nucleic Acid<br>Metabolism        | 6.42E-03 -<br>1.33E-10 | 32 | ACAA2<br>Acot1                                                                                                                                                                                        | ATP5PF<br>ATP5PO                                                                                                                                                                             | CES1<br>CMPK1                                                                                                                                                                               | GLYAT<br>Gnmt                                                                                                                                                           |

|               |                                 |                     |     |                                                                                                                                                      |                                                                                                                                  |                                                                                                                                          |                                                                                                                               |
|---------------|---------------------------------|---------------------|-----|------------------------------------------------------------------------------------------------------------------------------------------------------|----------------------------------------------------------------------------------------------------------------------------------|------------------------------------------------------------------------------------------------------------------------------------------|-------------------------------------------------------------------------------------------------------------------------------|
|               |                                 |                     |     | ACOT7<br>ACOX1<br>ALDOB<br>AMACR<br>ATP2B2<br>ATP5F1D                                                                                                | BAAT<br>BHMT<br>BHMT2<br>CALCB<br>Calm1<br>CAP1                                                                                  | CYP2C9<br>DBI<br>DECR2<br>DPYS<br>FABP1<br>GDA                                                                                           | GPD1<br>MAPK1<br>MAT1A<br>NAPRT<br>PNP<br>SOD1                                                                                |
| <b>Muscle</b> |                                 |                     |     |                                                                                                                                                      |                                                                                                                                  |                                                                                                                                          |                                                                                                                               |
| <b>1</b>      | Vitamin and Mineral Metabolism  | 2.00E-02 - 1.01E-04 | 5   | ACAA1<br>ALDH1A2                                                                                                                                     | CYP2E1                                                                                                                           | EZR                                                                                                                                      | HSPA8                                                                                                                         |
| <b>2</b>      | Energy Production               | 4.35E-02 - 4.10E-04 | 5   | ALDH1A2<br>ACAA1                                                                                                                                     | CHDH                                                                                                                             | CYP2E1                                                                                                                                   | PC                                                                                                                            |
| <b>3</b>      | Post-Translational Modification | 2.99E-02 - 6.64E-04 | 5   | HSPA8<br>OAT                                                                                                                                         | PDIA3                                                                                                                            | PRDX6                                                                                                                                    | YWHAZ                                                                                                                         |
| <b>Liver</b>  |                                 |                     |     |                                                                                                                                                      |                                                                                                                                  |                                                                                                                                          |                                                                                                                               |
| <b>1</b>      | Amino Acid Metabolism           | 6.09E-04 - 2.91E-18 | 26  | AGXT2<br>AHCY<br>ALDH1L1<br>ASS1<br>BAAT<br>BCKDHA<br>BCKDHB                                                                                         | BHMT<br>BHMT2<br>CKM<br>CKMT2<br>CPS1<br>CS<br>FAH                                                                               | GCSH<br>GLS2<br>GLUD1<br>GLUL<br>Gnmt<br>GSTZ1<br>HADH                                                                                   | HPD<br>MAT1A<br>NPPA<br>PKM<br>UPB1                                                                                           |
| <b>2</b>      | Small Molecule Biochemistry     | 6.82E-04 - 2.91E-18 | 103 | ACHE<br>ACLY<br>Acnat1/Acnat2<br>ACO2<br>Acot1<br>ACOT2<br>ACOX1<br>ACOX2<br>AGXT2<br>AHCY<br>AKR1A1<br>AKR1B1<br>AKR1C1/AKR1C2<br>Akr1c14<br>AKR1C3 | BAAT<br>BCKDHA<br>BCKDHB<br>BHMT<br>BHMT2<br>CKM<br>CKMT2<br>CPS1<br>CPT2<br>CS<br>CYB5B<br>CYCS<br>CYP2C19<br>CYP2C8<br>Cyp2d22 | GLUD1<br>GLUL<br>Gnmt<br>GPD1<br>GSTA2<br>GSTA3<br>GSTZ1<br>Gulo<br>HACL1<br>HADH<br>HMGCS2<br>HPD<br>HSD17B11<br>HSPA1A/HSPA1B<br>IDH3A | NPPA<br>NSDHL<br>PC<br>PDHA1<br>PDHB<br>PGRMC1<br>PKM<br>PMCH<br>POR<br>PTGR1<br>SCD<br>SLC25A5<br>SOD2<br>Sult1a1<br>SULT1B1 |

|   |                                   |                              |    |                                                                                                                                                |                                                                                                                         |                                                                                                                   |                                                                                                          |
|---|-----------------------------------|------------------------------|----|------------------------------------------------------------------------------------------------------------------------------------------------|-------------------------------------------------------------------------------------------------------------------------|-------------------------------------------------------------------------------------------------------------------|----------------------------------------------------------------------------------------------------------|
|   |                                   |                              |    | AKR1D1<br>ALDH1L1<br>ALDH9A1<br>ALDOA<br>ALDOB<br>AMACR<br>ANXA5<br>ASS1<br>Atp5e<br>ATP5F1C<br>ATP5PO                                         | DHRS4<br>EHHADH<br>FABP1<br>FABP3<br>FAH<br>FBP1<br>FH<br>GAPDHS<br>GC<br>GCSH<br>GLS2                                  | KHK<br>MAOA<br>MAOB<br>MAT1A<br>MB<br>MMP3<br>MYH3<br>MYH6<br>MYH7<br>MYH8<br>NDUFS1                              | TF<br>UGT1A6<br>UGT2B15<br>UGT2B17<br>UGT2B28<br>UGT2B7<br>UPB1<br>UQCRFS1<br>VIM<br>YWHAH               |
| 3 | Lipid<br>Metabolism               | 6.46E-04 -<br>2.21E-15       | 54 | ACHE<br>ACLY<br>Acnat1/Acnat2<br>Acot1<br>ACOT2<br>ACOX1<br>ACOX2<br>AKR1A1<br>AKR1B1<br>AKR1C1/AKR1C2<br>Akr1c14<br>AKR1C3<br>AKR1D1<br>AMACR | ANXA5<br>BAAT<br>CPT2<br>CS<br>CYB5B<br>CYCS<br>CYP2C19<br>CYP2C8<br>Cyp2d22<br>DHRS4<br>EHHADH<br>FABP1<br>FABP3<br>FH | GC<br>GSTA2<br>GSTA3<br>HACL1<br>HADH<br>HMGCS2<br>MAOA<br>MB<br>MMP3<br>NPPA<br>NSDHL<br>PDHA1<br>PDHB<br>PGRMC1 | PKM<br>POR<br>PTGR1<br>SCD<br>SOD2<br>Sult1a1<br>UGT2B15<br>UGT2B17<br>UGT2B28<br>UGT2B7<br>VIM<br>YWHAH |
|   | <b>Kidney</b>                     |                              |    |                                                                                                                                                |                                                                                                                         |                                                                                                                   |                                                                                                          |
| 1 | Drug<br>Metabolism                | 2.18E-02 -<br>3.88E-06       | 5  | GSTM1<br>GSTM2                                                                                                                                 | GSTO1                                                                                                                   | SLC3A2                                                                                                            | HSD3B2                                                                                                   |
| 2 | Molecular<br>Transport            | 2.66E-02 -<br>3.51E-05       | 16 | AHSG<br>BLVRA<br>Cyp4a14<br>FABP1                                                                                                              | FGG<br>GAPDHS<br>GRN<br>IL18                                                                                            | MGLL<br>PKM<br>RAB3A<br>RAB3C                                                                                     | RBP4<br>SCARB1<br>SLC12A5<br>SLC3A2                                                                      |
| 3 | Small<br>Molecule<br>Biochemistry | 2.69E-02 -<br>3.51E-05<br>26 | 26 | AHSG<br>ATP5PF<br>BLVRA<br>COTL1<br>Cyp4a14<br>DCXR<br>FABP1                                                                                   | GAPDHS<br>GRN<br>GSTM1<br>GSTM2<br>GSTO1<br>HSD3B2<br>Hsd3b4                                                            | IL18<br>LYZ<br>MCCC1<br>MGLL<br>MYH6<br>OTC<br>PKM                                                                | RBP4<br>SCARB1<br>SLC12A5<br>SLC3A2<br>TXNRD1                                                            |
