# Supplementary material for: Proteomic Analysis of Morphologically Changed Tissues after Prolonged Dexamethasone Treatment
Source: MDPI journal article supplement (doi:10.3390/ijms20133122), 2019-06-26
Supplement: s1 [file s1]

| Table S1 |              |                                                                |              |                                       |                         |
|----------|--------------|----------------------------------------------------------------|--------------|---------------------------------------|-------------------------|
|          | Accession No | Description                                                    | Expr p-value | Maximum Fold Change Value Dex/Control | Fold Change Dex/Control |
| Brain    |              |                                                                |              |                                       |                         |
| 1        | Q63081       | Protein disulfide-isomerase A6                                 | 2.76E-06     | 1.97                                  | Down                    |
| 2        | Q920J3       | Coronin-6                                                      | 6.03E-06     | 3.65                                  | Down                    |
| 3        | Q4FZY0       | EF-hand domain-containing protein D2                           | 6.93E-06     | Infinity                              | Down                    |
| 4        | Q5XIN6       | Mitochondrial proton/calcium exchanger protein                 | 8.43E-06     | 5.26                                  | Down                    |
| 5        | Q5U2W9       | Renalase                                                       | 1.47E-05     | 30.80                                 | Down                    |
| 6        | Q63345       | Myelin-oligodendrocyte glycoprotein                            | 2.87E-05     | 2.14                                  | Down                    |
| 7        | P63012       | Ras-related protein Rab-3A                                     | 3.40E-05     | 1.71                                  | Down                    |
| 8        | Q02563       | Synaptic vesicle glycoprotein 2A                               | 3.96E-05     | 2.26                                  | Down                    |
| 9        | Q6P6R2       | Dihydrolipoyl dehydrogenase, mitochondrial                     | 5.21E-05     | 2.14                                  | Down                    |
| 10       | P70619       | Glutathione reductase (Fragment)                               | 6.46E-05     | 2.09                                  | Down                    |
| 11       | P97943       | Scavenger receptor class B member 1                            | 7.56E-05     | 4.08                                  | Down                    |
| 12       | P48679       | Prelamin-A/C                                                   | 2.10E-04     | 1.81                                  | Down                    |
| 13       | O08700       | Vacuolar protein sorting-associated protein 45                 | 2.14E-04     | 2.89                                  | Down                    |
| 14       | Q5EAJ6       | Inhibitor of nuclear factor kappa-B kinase-interacting protein | 1.86E-04     | 2.39                                  | Down                    |
| 15       | Q6P6V0       | Glucose-6-phosphate isomerase                                  | 1.48E-04     | 2.11                                  | Down                    |
| 16       | P56741       | Myosin-binding protein C, cardiac-type                         | 9.35E-05     | 1.70                                  | Down                    |
| 17       | P12839       | Neurofilament medium polypeptide                               | 2.52E-04     | 1.66                                  | Down                    |
| 18       | Q62636       | Ras-related protein Rap-1b                                     | 2.77E-04     | 2.10                                  | Down                    |
| 19       | P84092       | AP-2 complex subunit mu                                        | 3.10E-04     | 2.06                                  | Down                    |
| 20       | P07687       | Epoxide hydrolase 1                                            | 3.13E-04     | 2.06                                  | Down                    |
| 21       | Q8VD83       | Ribonuclease pancreatic                                        | 3.27E-04     | 2.44                                  | Down                    |
| 22       | G3V7W1       | Programmed cell death protein 6                                | 3.42E-04     | 1.86                                  | Down                    |
| 23       | Q498T9       | Volume-regulated anion channel subunit LRRC8C                  | 3.42E-04     | 2.18                                  | Down                    |
| 24       | O35763       | Moesin                                                         | 4.25E-04     | 1.84                                  | Down                    |
| 25       | Q4KM74       | Vesicle-trafficking protein SEC22b                             | 4.70E-04     | 2.44                                  | Down                    |
| 26       | Q05683       | Glutamate decarboxylase 2                                      | 4.65E-04     | 2.72                                  | Down                    |
| 27       | Q5EB92       | WD repeat-containing protein 70                                | 6.59E-04     | 3.82                                  | Down                    |
| 28       | P80067       | Dipeptidyl peptidase 1                                         | 6.93E-04     | 3.52                                  | Down                    |
| 29       | P08503       | Medium-chain specific acyl-CoA dehydrogenase, mitochondrial    | 7.06E-04     | 1.55                                  | Down                    |
| 30       | P62824       | Ras-related protein Rab-3C                                     | 7.67E-04     | 1.72                                  | Down                    |
| 31       | O70199       | UDP-glucose 6-dehydrogenase                                    | 8.22E-04     | 1.66                                  | Down                    |
| 32       | P01026       | Complement C3                                                  | 8.24E-04     | 2.07                                  | Down                    |
| 33       | P41562       | Isocitrate dehydrogenase [NADP] cytoplasmic                    | 8.51E-04     | 1.50                                  | Down                    |
| 34       | P32851       | Syntaxin-1A                                                    | 1.19E-03     | 2.15                                  | Down                    |
| 35       | P07314       | Gamma-glutamyltranspeptidase 1                                 | 1.28E-03     | 3.07                                  | Down                    |
| 36       | Q4KM49       | Tyrosine--tRNA ligase, cytoplasmic                             | 1.61E-03     | 1.61                                  | Down                    |
| 37       | Q63413       | Spliceosome RNA helicase Ddx39b                                | 1.80E-03     | 1.92                                  | Down                    |
| 38       | Q9WVK7       | Hydroxyacyl-coenzyme A dehydrogenase, mitochondrial            | 2.01E-03     | 1.52                                  | Down                    |
| 39       | Q62722       | NGFI-A-binding protein 1                                       | 2.06E-03     | 1.69                                  | Down                    |
| 40       | Q63530       | Phosphotriesterase-related protein                             | 2.10E-03     | 1.95                                  | Down                    |

|    |        |                                                                         |          |       |      |
|----|--------|-------------------------------------------------------------------------|----------|-------|------|
| 41 | P11960 | 2-oxoisovalerate dehydrogenase subunit alpha, mitochondrial (Fragment)  | 2.14E-03 | 3.86  | Down |
| 42 | P80254 | D-dopachrome decarboxylase                                              | 2.14E-03 | 7.88  | Down |
| 43 | O35264 | Platelet-activating factor acetylhydrolase IB subunit beta              | 2.41E-03 | 1.62  | Down |
| 44 | Q6AY56 | Tubulin alpha-8 chain                                                   | 2.99E-03 | 2.43  | Down |
| 45 | P02563 | Myosin-6                                                                | 3.13E-03 | 2.05  | Down |
| 46 | Q5U316 | Ras-related protein Rab-35                                              | 3.65E-03 | 2.66  | Down |
| 47 | P67779 | Prohibitin                                                              | 3.75E-03 | 1.67  | Down |
| 48 | O35854 | Branched-chain-amino-acid aminotransferase, mitochondrial               | 3.89E-03 | 1.92  | Down |
| 49 | Q5XIT9 | Methylcrotonoyl-CoA carboxylase beta chain, mitochondrial               | 4.16E-03 | 1.71  | Down |
| 50 | P63245 | Receptor of activated protein C kinase 1                                | 4.35E-03 | 2.00  | Down |
| 51 | P25286 | V-type proton ATPase 116 kDa subunit a isoform 1                        | 4.45E-03 | 3.33  | Down |
| 52 | P13601 | Aldehyde dehydrogenase, cytosolic 1                                     | 4.90E-03 | 1.79  | Down |
| 53 | P08011 | Microsomal glutathione S-transferase 1                                  | 5.23E-03 | 2.43  | Down |
| 54 | Q6AY09 | Heterogeneous nuclear ribonucleoprotein H2                              | 5.90E-03 | 3.87  | Down |
| 55 | D3Z8N2 | E3 ubiquitin-protein ligase RNF187                                      | 5.90E-03 | 1.60  | Down |
| 56 | P20673 | Argininosuccinate lyase                                                 | 6.55E-03 | 1.77  | Down |
| 57 | Q9WUW8 | Sulfotransferase 1C2                                                    | 6.60E-03 | 1.86  | Down |
| 58 | P06866 | Haptoglobin                                                             | 6.77E-03 | 1.92  | Down |
| 59 | P12939 | Cytochrome P450 2D10                                                    | 6.94E-03 | 5.10  | Down |
| 60 | Q02974 | Ketohexokinase                                                          | 7.20E-03 | 4.81  | Down |
| 61 | P85973 | Purine nucleoside phosphorylase                                         | 7.28E-03 | 2.32  | Down |
| 62 | D3ZGQ5 | Serine/threonine-protein kinase Nek8                                    | 7.29E-03 | 4.98  | Down |
| 63 | P20059 | Hemopexin                                                               | 8.00E-03 | 2.11  | Down |
| 64 | Q7TP54 | Rho family-interacting cell polarization regulator 2                    | 8.63E-03 | 1.87  | Down |
| 65 | Q62838 | Muscle, skeletal receptor tyrosine protein kinase                       | 8.76E-03 | 3.53  | Down |
| 66 | Q5PPG7 | Eukaryotic translation initiation factor 2D                             | 1.09E-02 | 1.52  | Down |
| 67 | P09811 | Glycogen phosphorylase, liver form                                      | 9.52E-03 | 5.15  | Down |
| 68 | O54975 | Xaa-Pro aminopeptidase 1                                                | 1.01E-02 | 1.66  | Down |
| 69 | P07379 | Phosphoenolpyruvate carboxykinase, cytosolic [GTP]                      | 1.06E-02 | 1.60  | Down |
| 70 | P18484 | AP-2 complex subunit alpha-2                                            | 1.11E-02 | 2.37  | Down |
| 71 | P63331 | Serine/threonine-protein phosphatase 2A catalytic subunit alpha isoform | 1.17E-02 | 2.96  | Down |
| 72 | B9TQX4 | Unique cartilage matrix-associated protein                              | 1.31E-02 | 10.03 | Down |
| 73 | P05544 | Serine protease inhibitor A3L                                           | 1.37E-02 | 1.74  | Down |
| 74 | Q66HA6 | ADP-ribosylation factor-like protein 8B                                 | 1.46E-02 | 1.96  | Down |
| 75 | P18291 | Granzyme B                                                              | 1.49E-02 | 44.15 | Down |
| 76 | Q6UPE0 | Choline dehydrogenase, mitochondrial                                    | 1.91E-02 | 4.67  | Down |
| 77 | P51635 | Alcohol dehydrogenase [NADP(+)]                                         | 2.05E-02 | 1.76  | Down |
| 78 | Q5XI32 | F-actin-capping protein subunit beta                                    | 2.22E-02 | 1.79  | Down |
| 79 | O35814 | Stress-induced-phosphoprotein 1                                         | 2.34E-02 | 1.61  | Down |
| 80 | Q9ESG3 | Collectrin                                                              | 2.35E-02 | 1.62  | Down |
| 81 | P54921 | Alpha-soluble NSF attachment protein                                    | 2.46E-02 | 1.63  | Down |
| 82 | P07943 | Aldose reductase                                                        | 2.74E-02 | 2.09  | Down |
| 83 | P13471 | 40S ribosomal protein S14                                               | 2.91E-02 | 1.69  | Down |
| 84 | Q68G31 | Phenazine biosynthesis-like domain-containing protein                   | 3.06E-02 | 1.87  | Down |

|     |        |                                                                      |          |          |      |
|-----|--------|----------------------------------------------------------------------|----------|----------|------|
| 85  | P50398 | Rab GDP dissociation inhibitor alpha                                 | 3.17E-02 | 1.69     | Down |
| 86  | O08816 | Neural Wiskott-Aldrich syndrome protein                              | 3.21E-02 | 2.31     | Down |
| 87  | Q4V8I7 | Volume-regulated anion channel subunit LRRC8A                        | 3.37E-02 | 1.61     | Down |
| 88  | Q6AYN4 | Phytanoyl-CoA hydroxylase-interacting protein-like                   | 3.42E-02 | 1.51     | Down |
| 89  | P19332 | Microtubule-associated protein tau                                   | 3.47E-02 | 1.66     | Down |
| 90  | Q91ZW1 | Transcription factor A, mitochondrial                                | 3.49E-02 | 1.88     | Down |
| 91  | Q5U1Y1 | Ras-related protein Rab-34                                           | 3.52E-02 | 2.06     | Down |
| 92  | P57113 | Maleylacetoacetate isomerase                                         | 3.68E-02 | 2.92     | Down |
| 93  | P17425 | Hydroxymethylglutaryl-CoA synthase, cytoplasmic                      | 3.98E-02 | 1.92     | Down |
| 94  | P07756 | Carbamoyl-phosphate synthase [ammonia], mitochondrial                | 4.12E-02 | 1.72     | Down |
| 95  | Q6IE52 | Murinoglobulin-2                                                     | 4.20E-02 | 1.81     | Down |
| 96  | Q6AYS7 | Aminoacylase-1A                                                      | 4.21E-02 | 2.13     | Down |
| 97  | Q5BJY9 | Keratin, type I cytoskeletal 18                                      | 4.51E-02 | 1.69     | Down |
| 98  | P08733 | Myosin regulatory light chain 2, ventricular/cardiac muscle isoform  | 4.58E-02 | 1.51     | Down |
| 99  | Q6MFY8 | Tripartite motif-containing protein 40                               | 4.59E-02 | 2.39     | Down |
| 100 | Q63537 | Synapsin-2                                                           | 3.23E-07 | 2.78     | UP   |
| 101 | Q38RY9 | Cytochrome c oxidase subunit 2                                       | 1.33E-06 | Infinity | UP   |
| 102 | P38718 | Mitochondrial pyruvate carrier 2                                     | 2.46E-06 | 2452.79  | UP   |
| 103 | A9UMV8 | Histone H2A.J                                                        | 1.58E-05 | 4.76     | UP   |
| 104 | Q9ESV6 | Glyceraldehyde-3-phosphate dehydrogenase, testis-specific            | 3.24E-05 | 1.94     | UP   |
| 105 | P04355 | Metallothionein-2                                                    | 8.70E-06 | 11152.34 | UP   |
| 106 | P23565 | Alpha-internexin                                                     | 3.09E-06 | 3.10     | UP   |
| 107 | A1EC95 | HEAT repeat-containing protein 6                                     | 5.88E-05 | 2.98     | UP   |
| 108 | P0C0S7 | Histone H2A.Z                                                        | 6.01E-05 | 3.04     | UP   |
| 109 | Q75Q40 | Mitochondrial import receptor subunit TOM40 homolog                  | 8.01E-05 | 15.82    | UP   |
| 110 | P11517 | Hemoglobin subunit beta-2                                            | 8.89E-05 | 1.69     | UP   |
| 111 | Q5FVI4 | Cell cycle exit and neuronal differentiation protein 1               | 9.19E-05 | 1.66     | UP   |
| 112 | Q5PQN0 | Neurocalcin-delta                                                    | 3.81E-04 | 1.82     | UP   |
| 113 | Q6IUR5 | Neudesin                                                             | 9.67E-05 | 2.02     | UP   |
| 114 | P04631 | Protein S100-B                                                       | 1.27E-04 | 1.79     | UP   |
| 115 | P04797 | Glyceraldehyde-3-phosphate dehydrogenase                             | 1.95E-04 | 2.73     | UP   |
| 116 | Q63068 | Phosphorylated adapter RNA export protein                            | 1.70E-04 | Infinity | UP   |
| 117 | P09117 | Fructose-bisphosphate aldolase C                                     | 3.39E-04 | 1.61     | UP   |
| 118 | P62804 | Histone H4                                                           | 4.34E-04 | 2.14     | UP   |
| 120 | O35331 | Pyridoxal kinase                                                     | 4.81E-04 | 2.14     | UP   |
| 121 | P63029 | Translationally-controlled tumor protein                             | 5.43E-04 | 1.73     | UP   |
| 122 | P35704 | Peroxiredoxin-2                                                      | 5.98E-04 | 1.77     | UP   |
| 123 | O88267 | Acyl-coenzyme A thioesterase 1                                       | 2.17E-04 | 4.21     | UP   |
| 124 | B0BNA5 | Coactosin-like protein                                               | 2.30E-04 | 2.64     | UP   |
| 125 | P09527 | Ras-related protein Rab-7a                                           | 8.90E-04 | 3.61     | UP   |
| 126 | P24942 | Excitatory amino acid transporter 1                                  | 9.46E-04 | 2.96     | UP   |
| 127 | A7VJC2 | Heterogeneous nuclear ribonucleoproteins A2/B1                       | 9.70E-04 | 1.62     | UP   |
| 128 | P19527 | Neurofilament light polypeptide                                      | 1.32E-03 | 1.81     | UP   |
| 129 | O35796 | Complement component 1 Q subcomponent-binding protein, mitochondrial | 1.45E-03 | 1.64     | UP   |

|     |        |                                                               |          |          |    |
|-----|--------|---------------------------------------------------------------|----------|----------|----|
| 130 | P45479 | Palmitoyl-protein thioesterase 1                              | 1.58E-03 | 4.24     | UP |
| 131 | P00406 | Cytochrome c oxidase subunit 2                                | 1.59E-03 | 10.07    | UP |
| 132 | Q5I0P2 | Glycine cleavage system H protein, mitochondrial              | 2.52E-03 | 12.30    | UP |
| 133 | P58775 | Tropomyosin beta chain                                        | 2.54E-03 | 1.55     | UP |
| 134 | Q6AXS3 | Protein DEK                                                   | 2.73E-03 | Infinity | UP |
| 135 | Q00566 | Methyl-CpG-binding protein 2                                  | 2.78E-03 | 6.43     | UP |
| 136 | P06349 | Histone H1t                                                   | 2.78E-03 | 2.43     | UP |
| 137 | P53767 | Vascular endothelial growth factor receptor 1                 | 3.28E-03 | 1.93     | UP |
| 138 | Q9JJK1 | Neuronal membrane glycoprotein M6-b                           | 3.47E-03 | 1.68     | UP |
| 139 | P05714 | Ras-related protein Rab-4A                                    | 3.68E-03 | 4.59     | UP |
| 140 | P04906 | Glutathione S-transferase P                                   | 3.85E-03 | 2.13     | UP |
| 141 | P51647 | Retinal dehydrogenase 1                                       | 4.17E-03 | 1.69     | UP |
| 142 | P16303 | Carboxylesterase 1D                                           | 6.38E-03 | 2.09     | UP |
| 143 | Q5I0C3 | Methylcrotonoyl-CoA carboxylase subunit alpha, mitochondrial  | 7.05E-03 | 22.49    | UP |
| 144 | Q8CFG5 | Voltage-dependent calcium channel subunit alpha-2/delta-3     | 7.13E-03 | 16.10    | UP |
| 145 | B0BNF1 | Septin-8                                                      | 9.03E-03 | 3.03     | UP |
| 146 | Q6AXP3 | Protein FAM227B                                               | 1.01E-02 | 3.42     | UP |
| 147 | P49911 | Acidic leucine-rich nuclear phosphoprotein 32 family member A | 1.07E-02 | 2.10     | UP |
| 148 | Q07116 | Sulfite oxidase, mitochondrial                                | 1.10E-02 | 1.76     | UP |
| 149 | P42123 | L-lactate dehydrogenase B chain                               | 1.11E-02 | 1.77     | UP |
| 150 | B2RYG6 | Ubiquitin thioesterase OTUB1                                  | 1.30E-02 | 2.87     | UP |
| 151 | P13638 | Sodium/potassium-transporting ATPase subunit beta-2           | 1.40E-02 | 4.13     | UP |
| 152 | O88377 | Phosphatidylinositol 5-phosphate 4-kinase type-2 beta         | 1.46E-02 | 43.73    | UP |
| 153 | Q0VGK3 | Glycerate kinase                                              | 1.51E-02 | Infinity | UP |
| 154 | P19139 | Casein kinase II subunit alpha                                | 1.52E-02 | 4.00     | UP |
| 155 | Q05962 | ADP/ATP translocase 1                                         | 1.74E-02 | 1.56     | UP |
| 156 | B0BNN3 | Carbonic anhydrase 1                                          | 1.86E-02 | 1.75     | UP |
| 157 | O88780 | Kallikrein-8                                                  | 1.92E-02 | 2.16     | UP |
| 158 | D3ZAF6 | ATP synthase subunit f, mitochondrial                         | 2.05E-02 | 1.64     | UP |
| 159 | P23785 | Granulins                                                     | 2.06E-02 | Infinity | UP |
| 160 | Q09073 | ADP/ATP translocase 2                                         | 2.23E-02 | 1.60     | UP |
| 161 | P27952 | 40S ribosomal protein S2                                      | 2.30E-02 | 2.91     | UP |
| 162 | Q8R424 | STAM-binding protein                                          | 2.33E-02 | 1.74     | UP |
| 164 | P21571 | ATP synthase-coupling factor 6, mitochondrial                 | 2.42E-02 | 1.51     | UP |
| 165 | P11030 | Acyl-CoA-binding protein                                      | 2.62E-02 | 2.68     | UP |
| 166 | Q66H89 | Centrosomal protein of 83 kDa                                 | 2.75E-02 | 4.70     | UP |
| 167 | Q9Z0J8 | Neuronal growth regulator 1                                   | 2.77E-02 | 2.19     | UP |
| 168 | P18421 | Proteasome subunit beta type-1                                | 2.87E-02 | 3.58     | UP |
| 169 | P47875 | Cysteine and glycine-rich protein 1                           | 2.87E-02 | 3.18     | UP |
| 170 | P60203 | Myelin proteolipid protein                                    | 2.87E-02 | 2.82     | UP |
| 171 | Q02874 | Core histone macro-H2A.1                                      | 3.46E-02 | 2.35     | UP |
| 172 | P62250 | 40S ribosomal protein S16                                     | 3.00E-02 | 5.60     | UP |
| 173 | P11506 | Plasma membrane calcium-transporting ATPase 2                 | 3.05E-02 | 5.54     | UP |
| 174 | P15865 | Histone H1.4                                                  | 3.18E-02 | 2.61     | UP |

|     |        |                                                                |          |      |    |
|-----|--------|----------------------------------------------------------------|----------|------|----|
| 175 | Q6AYZ1 | Tubulin alpha-1C chain                                         | 3.38E-02 | 2.37 | UP |
| 176 | P46462 | Transitional endoplasmic reticulum ATPase                      | 3.52E-02 | 1.62 | UP |
| 177 | P70470 | Acyl-protein thioesterase 1                                    | 3.58E-02 | 2.35 | UP |
| 178 | P10719 | ATP synthase subunit beta, mitochondrial                       | 3.61E-02 | 1.76 | UP |
| 179 | Q4V8B3 | Mediator of RNA polymerase II transcription subunit 24         | 3.91E-02 | 1.54 | UP |
| 180 | P12075 | Cytochrome c oxidase subunit 5B, mitochondrial                 | 3.91E-02 | 3.48 | UP |
| 181 | P52481 | Adenylyl cyclase-associated protein 2                          | 4.09E-02 | 3.98 | UP |
| 182 | O35244 | Peroxiredoxin-6                                                | 4.22E-02 | 1.52 | UP |
| 183 | P49242 | 40S ribosomal protein S3a                                      | 4.31E-02 | 1.89 | UP |
| 184 | Q8VD93 | Ribonuclease pancreatic alpha-type OS=Rattus exulans PE=3 SV=1 | 4.35E-02 | 7.57 | UP |
| 185 | P97697 | Inositol monophosphatase 1                                     | 4.47E-02 | 2.33 | UP |
| 186 | P63041 | Complexin-1                                                    | 4.51E-02 | 4.87 | UP |
| 187 | P60868 | 40S ribosomal protein S20                                      | 4.70E-02 | 3.33 | UP |
| 188 | Q3MIE0 | Enoyl-CoA hydratase domain-containing protein 3, mitochondrial | 4.79E-02 | 1.63 | UP |
| 189 | Q68FU3 | Electron transfer flavoprotein subunit beta                    | 4.80E-02 | 2.29 | UP |
| 190 | P63322 | Ras-related protein Ral-A                                      | 4.82E-02 | 1.94 | UP |
| 191 | Q64559 | Cytosolic acyl coenzyme A thioester hydrolase                  | 4.83E-02 | 1.58 | UP |
| 192 | P13635 | Ceruloplasmin                                                  | 4.99E-02 | 2.19 | UP |

|       |        |                                                             |          |         |      |
|-------|--------|-------------------------------------------------------------|----------|---------|------|
| Heart |        |                                                             |          |         |      |
| 1.    | Q9ES21 | SAC1 like phosphatidylinositide phosphatase                 | 7.57E-06 | 6223.63 | Down |
| 2.    | P10634 | Cytochrome P450, family 2, subfamily d, polypeptide 26      | 1.26E-06 | 2715.07 | Down |
| 3.    | Q9ES53 | Ubiquitin recognition factor in ER associated degradation 1 | 6.67E-03 | 75.80   | Down |
| 4.    | P85973 | Purine nucleoside phosphorylase                             | 5.57E-04 | 68.13   | Down |
| 5.    | O89049 | Thioredoxin reductase 1                                     | 9.42E-04 | 58.13   | Down |
| 6.    | Q3MIE0 | Enoyl-coa hydratase domain containing 3                     | 2.86E-03 | 57.69   | Down |
| 7.    | D3ZGS3 | OCRL, inositol polyphosphate-5-phosphatase                  | 2.66E-04 | 37.88   | Down |
| 8.    | P07687 | Epoxide hydrolase 1                                         | 1.07E-02 | 36.59   | Down |
| 9.    | Q63276 | Bile acid-coa:amino acid N-acyltransferase                  | 1.69E-04 | 26.83   | Down |
| 10.   | P23457 | Aldo-keto reductase family 1, member C14                    | 5.11E-03 | 22.56   | Down |
| 11.   | P07150 | Annexin A1                                                  | 1.38E-03 | 20.30   | Down |
| 12.   | P02692 | Fatty acid binding protein 1                                | 1.68E-02 | 19.83   | Down |
| 13.   | B0K020 | CDGSH iron sulfur domain 1                                  | 1.16E-02 | 16.47   | Down |
| 14.   | Q6IUR5 | Neudesin neurotrophic factor                                | 4.02E-02 | 14.94   | Down |
| 15.   | P17988 | Sulfotransferase family 1A, phenol-preferring, member 1     | 4.82E-03 | 14.83   | Down |
| 16.   | P63322 | RAS like proto-oncogene A                                   | 6.62E-03 | 14.78   | Down |
| 17.   | Q99P82 | Claudin 11                                                  | 5.42E-03 | 12.89   | Down |
| 18.   | Q5PPJ9 | SH3 domain-containing GRB2-like endophilin B2               | 2.04E-03 | 11.47   | Down |
| 19.   | P06757 | Alcohol dehydrogenase 1C (class I), gamma polypeptide       | 3.32E-05 | 10.95   | Down |
| 20.   | P16303 | Carboxylesterase 1                                          | 1.07E-03 | 10.94   | Down |
| 21.   | P08683 | Cytochrome P450 family 2 subfamily C member 9               | 4.98E-04 | 10.74   | Down |
| 22.   | P62250 | Ribosomal protein S16                                       | 1.09E-03 | 10.71   | Down |
| 23.   | P14141 | Carbonic anhydrase 3                                        | 2.71E-06 | 7.96    | Down |

|     |        |                                                        |          |      |      |
|-----|--------|--------------------------------------------------------|----------|------|------|
| 24. | P07756 | Carbamoyl-phosphate synthase 1                         | 1.69E-05 | 7.06 | Down |
| 25. | P38718 | Mitochondrial pyruvate carrier 2                       | 1.73E-02 | 6.81 | Down |
| 26. | P10818 | Cytochrome c oxidase subunit 6A1                       | 1.50E-04 | 6.64 | Down |
| 27. | Q63544 | Synuclein gamma                                        | 3.49E-02 | 6.14 | Down |
| 28. | P22791 | 3-hydroxy-3-methylglutaryl-coa synthase 2              | 1.34E-05 | 5.38 | Down |
| 29. | P57113 | Glutathione S-transferase zeta 1                       | 5.07E-04 | 5.16 | Down |
| 30. | Q5M7T9 | Threonine synthase like 2                              | 4.21E-03 | 4.31 | Down |
| 31. | P08542 | UDP glucuronosyltransferase 2 family, polypeptide B15  | 3.13E-04 | 4.29 | Down |
| 32. | P00502 | Glutathione S-transferase alpha 1                      | 6.67E-03 | 4.06 | Down |
| 33. | P00884 | Aldolase, fructose-bisphosphate B                      | 2.02E-03 | 3.98 | Down |
| 34. | Q9JM01 | Cyclin dependent kinase like 3                         | 6.88E-06 | 3.89 | Down |
| 35. | Q63666 | Vesicle-associated membrane protein 1                  | 4.00E-04 | 3.60 | Down |
| 36. | P52759 | Reactive intermediate imine deaminase A homolog        | 2.51E-04 | 3.58 | Down |
| 37. | P31977 | Ezrin                                                  | 7.41E-05 | 3.57 | Down |
| 38. | P04905 | Glutathione S-transferase mu 5                         | 9.49E-04 | 3.52 | Down |
| 39. | Q8VIF7 | Selenium binding protein 1                             | 1.83E-03 | 3.20 | Down |
| 40. | P09527 | RAB7A, member RAS oncogene family                      | 3.42E-02 | 3.15 | Down |
| 41. | B5DFI8 | Ubiquitin conjugating enzyme E2 S                      | 1.32E-02 | 3.04 | Down |
| 42. | P09034 | Argininosuccinate synthase 1                           | 1.02E-04 | 3.02 | Down |
| 43. | P51146 | RAB4B, member RAS oncogene family                      | 8.97E-03 | 3.02 | Down |
| 44. | P19112 | Fructose-bisphosphatase 1                              | 3.69E-04 | 3.00 | Down |
| 45. | P07824 | Arginase 1                                             | 2.36E-04 | 2.99 | Down |
| 46. | Q812E9 | Glycoprotein M6A                                       | 1.06E-03 | 2.96 | Down |
| 47. | D4AE41 | RBMX like 1                                            | 7.19E-04 | 2.93 | Down |
| 48. | P48004 | Proteasome subunit alpha 7                             | 9.49E-03 | 2.92 | Down |
| 49. | Q63150 | Dihydropyrimidinase                                    | 1.55E-03 | 2.89 | Down |
| 50. | Q5PQT3 | Glycine-N-acyltransferase                              | 1.65E-03 | 2.88 | Down |
| 51. | P85970 | Actin related protein 2/3 complex subunit 2            | 6.11E-03 | 2.87 | Down |
| 52. | P62243 | Ribosomal protein S8                                   | 7.91E-04 | 2.78 | Down |
| 53. | P18420 | Proteasome subunit alpha 1                             | 1.81E-02 | 2.68 | Down |
| 54. | P0DP29 | Calmodulin 1                                           | 7.90E-04 | 2.68 | Down |
| 55. | P19488 | UDP glucuronosyltransferase family 2 member B15        | 3.09E-03 | 2.68 | Down |
| 56. | Q03248 | Beta-ureidopropionase 1                                | 1.50E-02 | 2.65 | Down |
| 57. | P08010 | Glutathione S-transferase mu 1                         | 1.17E-03 | 2.64 | Down |
| 58. | P24470 | Cytochrome P450, family 2, subfamily c, polypeptide 23 | 4.26E-02 | 2.58 | Down |
| 59. | P02401 | Ribosomal protein, large P2                            | 7.05E-03 | 2.54 | Down |
| 60. | P60522 | GABA type A receptor associated protein like 2         | 4.89E-02 | 2.49 | Down |
| 61. | P20070 | Cytochrome b5 reductase 3                              | 4.18E-03 | 2.44 | Down |
| 62. | Q497B0 | Nitrilase family member 2                              | 1.01E-03 | 2.40 | Down |
| 63. | P61980 | Heterogeneous nuclear ribonucleoprotein K              | 2.55E-03 | 2.40 | Down |
| 64. | P27867 | Sorbitol dehydrogenase                                 | 6.38E-04 | 2.38 | Down |
| 65. | Q63108 | Carboxylesterase 1E                                    | 2.64E-02 | 2.37 | Down |

|      |        |                                                                              |          |      |      |
|------|--------|------------------------------------------------------------------------------|----------|------|------|
| 66.  | P00173 | Cytochrome b5 type A                                                         | 4.87E-04 | 2.36 | Down |
| 67.  | Q63537 | Synapsin II                                                                  | 7.92E-03 | 2.33 | Down |
| 68.  | Q64559 | Acyl-coa thioesterase 7                                                      | 6.98E-03 | 2.32 | Down |
| 69.  | P47853 | Biglycan                                                                     | 3.07E-02 | 2.32 | Down |
| 70.  | Q62625 | Microtubule associated protein 1 light chain 3 beta                          | 3.74E-03 | 2.32 | Down |
| 71.  | P25286 | Atpase H+ transporting V0 subunit a1                                         | 2.12E-04 | 2.25 | Down |
| 72.  | Q6UPE0 | Choline dehydrogenase                                                        | 4.39E-04 | 2.23 | Down |
| 73.  | P04904 | Glutathione S-transferase alpha 1                                            | 4.18E-04 | 2.18 | Down |
| 74.  | O09171 | Betaine--homocysteine S-methyltransferase                                    | 6.48E-04 | 2.14 | Down |
| 75.  | Q5PPG7 | Eukaryotic translation initiation factor 2D                                  | 9.82E-03 | 2.14 | Down |
| 76.  | P70473 | Alpha-methylacyl-coa racemase                                                | 3.10E-03 | 2.14 | Down |
| 77.  | Q4QRB4 | Tubulin beta 3 class III                                                     | 4.53E-02 | 2.08 | Down |
| 78.  | P46418 | Glutathione S-transferase alpha 3                                            | 3.21E-04 | 2.07 | Down |
| 79.  | P04762 | Catalase                                                                     | 1.98E-04 | 2.07 | Down |
| 80.  | Q64638 | UDP glucuronosyltransferase family 1 member A4                               | 8.24E-05 | 2.05 | Down |
| 81.  | P84092 | Adaptor related protein complex 2 subunit mu 1                               | 1.80E-04 | 2.02 | Down |
| 82.  | P38918 | Aldo-keto reductase family 7 member A3                                       | 3.73E-04 | 2.00 | Down |
| 83.  | P18757 | Cystathionine gamma-lyase                                                    | 4.33E-03 | 1.99 | Down |
| 84.  | Q64057 | Aldehyde dehydrogenase 7 family member A1                                    | 3.90E-02 | 1.99 | Down |
| 85.  | O35077 | Glycerol-3-phosphate dehydrogenase 1                                         | 2.96E-04 | 1.98 | Down |
| 86.  | Q7TP52 | Carboxymethylenebutenolidase homolog                                         | 4.17E-03 | 1.88 | Down |
| 87.  | P06761 | Heat shock protein family A (Hsp70) member 5                                 | 5.31E-04 | 1.86 | Down |
| 88.  | Q08163 | Cyclase associated actin cytoskeleton regulatory protein 1                   | 8.36E-03 | 1.82 | Down |
| 89.  | Q9ESG3 | Collectrin, amino acid transport regulator                                   | 4.41E-03 | 1.82 | Down |
| 90.  | P07632 | Superoxide dismutase 1                                                       | 7.07E-04 | 1.80 | Down |
| 91.  | P38983 | Ribosomal protein SA                                                         | 2.57E-02 | 1.79 | Down |
| 92.  | Q561S0 | NADH:ubiquinone oxidoreductase subunit A10                                   | 1.70E-02 | 1.78 | Down |
| 93.  | Q5PPJ4 | Deoxyhypusine hydroxylase                                                    | 1.02E-02 | 1.75 | Down |
| 94.  | Q4KLZ6 | Triokinase and FMN cyclase                                                   | 1.82E-02 | 1.74 | Down |
| 95.  | Q68FT5 | Betaine--homocysteine S-methyltransferase 2                                  | 6.27E-04 | 1.73 | Down |
| 96.  | P11030 | Diazepam binding inhibitor, acyl-coa binding protein                         | 8.53E-03 | 1.72 | Down |
| 97.  | P30904 | Macrophage migration inhibitory factor                                       | 1.15E-02 | 1.71 | Down |
| 98.  | P08009 | Glutathione S-transferase mu 2                                               | 9.78E-03 | 1.68 | Down |
| 99.  | P27364 | Hydroxy-delta-5-steroid dehydrogenase, 3 beta- and steroid delta-isomerase 4 | 3.30E-02 | 1.66 | Down |
| 100. | P09811 | Glycogen phosphorylase L                                                     | 4.16E-02 | 1.65 | Down |
| 101. | Q62876 | Synaptogyrin 1                                                               | 1.30E-03 | 1.62 | Down |
| 102. | Q5BK61 | Sorting nexin 20                                                             | 2.35E-02 | 1.62 | Down |
| 103. | Q63081 | Protein disulfide isomerase family A member 6                                | 2.14E-02 | 1.61 | Down |
| 104. | Q9R1T5 | Aspartoacylase                                                               | 4.73E-03 | 1.61 | Down |
| 105. | P62278 | Predicted gene 15483                                                         | 3.93E-02 | 1.61 | Down |
| 106. | P19944 | Ribosomal protein lateral stalk subunit P1                                   | 9.19E-03 | 1.61 | Down |
| 107. | Q68FR6 | Eukaryotic translation elongation factor 1 gamma                             | 4.07E-02 | 1.60 | Down |

|      |        |                                                                   |          |      |      |
|------|--------|-------------------------------------------------------------------|----------|------|------|
| 108. | Q9WVK3 | Peroxisomal trans-2-enoyl-coa reductase                           | 3.99E-03 | 1.59 | Down |
| 109. | P80067 | Cathepsin C                                                       | 1.29E-03 | 1.58 | Down |
| 110. | P13437 | Acetyl-coa acyltransferase 2                                      | 4.06E-03 | 1.58 | Down |
| 111. | O35303 | Dynamin 1 like                                                    | 2.72E-02 | 1.57 | Down |
| 112. | P13255 | Glycine N-methyltransferase                                       | 7.24E-04 | 1.57 | Down |
| 113. | Q03336 | Regucalcin                                                        | 9.21E-04 | 1.56 | Down |
| 114. | P27952 | Ribosomal protein S2                                              | 2.36E-02 | 1.54 | Down |
| 115. | Q6MG60 | Dimethylarginine dimethylaminohydrolase 2                         | 6.57E-03 | 1.50 | Up   |
| 116. | Q6IE52 | Murinoglobulin 1                                                  | 4.13E-03 | 1.50 | Up   |
| 117. | P18484 | Adaptor related protein complex 2 subunit alpha 2                 | 1.76E-03 | 1.51 | Up   |
| 118. | P63086 | Mitogen-activated protein kinase 1                                | 3.77E-05 | 1.51 | Up   |
| 119. | Q8VHV7 | Heterogeneous nuclear ribonucleoprotein H1                        | 1.17E-02 | 1.51 | Up   |
| 120. | Q62812 | Myosin heavy chain 9                                              | 7.47E-03 | 1.51 | Up   |
| 121. | P16232 | Hydroxysteroid 11-beta dehydrogenase 1                            | 8.81E-03 | 1.52 | Up   |
| 122. | P19139 | Casein kinase 2 alpha 1                                           | 3.66E-02 | 1.52 | Up   |
| 123. | P07483 | Fatty acid binding protein 3                                      | 2.87E-02 | 1.52 | Up   |
| 124. | P11442 | Clathrin heavy chain                                              | 1.07E-04 | 1.53 | Up   |
| 125. | Q06647 | ATP synthase peripheral stalk subunit OSCP                        | 1.87E-02 | 1.53 | Up   |
| 126. | Q6PCU2 | Atpase H+ transporting V1 subunit E1                              | 1.01E-03 | 1.53 | Up   |
| 127. | P12939 | Cytochrome P450, family 2, subfamily d, polypeptide 1             | 1.32E-04 | 1.53 | Up   |
| 128. | P62632 | Eukaryotic translation elongation factor 1 alpha 2                | 1.16E-03 | 1.54 | Up   |
| 129. | Q8R424 | STAM binding protein                                              | 1.71E-02 | 1.54 | Up   |
| 130. | P07872 | Acyl-coa oxidase 1                                                | 2.13E-03 | 1.55 | Up   |
| 131. | P09605 | Creatine kinase, mitochondrial 2                                  | 1.79E-02 | 1.55 | Up   |
| 132. | O35264 | Platelet activating factor acetylhydrolase 1b catalytic subunit 2 | 1.24E-02 | 1.56 | Up   |
| 133. | P63088 | Protein phosphatase 1 catalytic subunit gamma                     | 7.54E-04 | 1.56 | Up   |
| 134. | P24053 | Neuromedin B receptor                                             | 8.94E-03 | 1.56 | Up   |
| 135. | Q9Z2M4 | 2,4-dienoyl-coa reductase 2                                       | 4.68E-02 | 1.57 | Up   |
| 136. | O35814 | Stress induced phosphoprotein 1                                   | 1.09E-03 | 1.57 | Up   |
| 137. | Q53B90 | RAB43, member RAS oncogene family                                 | 2.84E-02 | 1.58 | Up   |
| 138. | Q9WTT6 | Guanine deaminase                                                 | 6.99E-03 | 1.60 | Up   |
| 139. | Q920A6 | Serine carboxypeptidase 1                                         | 1.75E-02 | 1.60 | Up   |
| 140. | Q68FP1 | Gelsolin                                                          | 1.24E-02 | 1.61 | Up   |
| 141. | P04256 | Heterogeneous nuclear ribonucleoprotein A1                        | 5.75E-03 | 1.61 | Up   |
| 142. | O88267 | Acyl-coa thioesterase 1                                           | 2.61E-03 | 1.61 | Up   |
| 143. | P29147 | 3-hydroxybutyrate dehydrogenase 1                                 | 4.05E-03 | 1.62 | Up   |
| 144. | Q66HF8 | Aldehyde dehydrogenase 1 family member B1                         | 7.02E-03 | 1.62 | Up   |
| 145. | P50463 | Cysteine and glycine rich protein 3                               | 3.23E-03 | 1.62 | Up   |
| 146. | O35095 | Neurochondrin                                                     | 1.81E-03 | 1.63 | Up   |
| 147. | D4A1J4 | 3-hydroxybutyrate dehydrogenase 2                                 | 6.73E-04 | 1.67 | Up   |
| 148. | P06238 | Alpha-2-macroglobulin                                             | 4.84E-04 | 1.67 | Up   |
| 149. | P70536 | Oxytocin receptor                                                 | 2.09E-04 | 1.68 | Up   |



|      |        |                                                        |          |      |    |
|------|--------|--------------------------------------------------------|----------|------|----|
| 150. | Q4KM73 | Cytidine/uridine monophosphate kinase 1                | 7.48E-05 | 1.69 | Up |
| 151. | Q5U3Z6 | Deuterosome assembly protein 1                         | 1.65E-03 | 1.69 | Up |
| 152. | P07722 | Myelin associated glycoprotein                         | 1.23E-02 | 1.70 | Up |
| 153. | P24464 | Cytochrome P450 family 4 subfamily A member 22         | 1.08E-03 | 1.70 | Up |
| 154. | P62142 | Protein phosphatase 1 catalytic subunit beta           | 4.29E-03 | 1.71 | Up |
| 155. | Q5BJL5 | Strawberry notch homolog 1                             | 2.18E-03 | 1.71 | Up |
| 156. | P13601 | Aldehyde dehydrogenase family 1, subfamily A7          | 2.14E-04 | 1.72 | Up |
| 157. | P32851 | Syntaxin 1A                                            | 7.88E-04 | 1.76 | Up |
| 158. | P09951 | Synapsin I                                             | 4.84E-03 | 1.77 | Up |
| 159. | Q1WIM3 | Cell adhesion molecule 3                               | 4.81E-03 | 1.78 | Up |
| 160. | A1EC95 | HEAT repeat containing 6                               | 2.42E-05 | 1.78 | Up |
| 161. | P35171 | Cytochrome c oxidase subunit viia polypeptide 2-like 2 | 5.53E-03 | 1.80 | Up |
| 162. | Q6XQN1 | Nicotinate phosphoribosyltransferase                   | 2.21E-02 | 1.80 | Up |
| 163. | P41562 | Isocitrate dehydrogenase (NADP(+)) 1, cytosolic        | 1.52E-04 | 1.83 | Up |
| 164. | P01256 | Calcitonin related polypeptide beta                    | 2.09E-02 | 1.84 | Up |
| 165. | Q5U2W9 | Renalase, FAD dependent amine oxidase                  | 3.27E-03 | 1.88 | Up |
| 166. | O35115 | Four and a half LIM domains 2                          | 1.15E-03 | 1.89 | Up |
| 167. | O08838 | Amphiphysin                                            | 5.52E-03 | 1.90 | Up |
| 168. | Q5XIU9 | Progesterone receptor membrane component 2             | 1.31E-03 | 1.90 | Up |
| 169. | Q499N5 | Acyl-coa synthetase family member 2                    | 8.21E-04 | 1.90 | Up |
| 170. | Q4V7A0 | WD repeat domain 61                                    | 7.73E-04 | 1.90 | Up |
| 171. | P08733 | Myosin light chain 2                                   | 6.87E-03 | 1.90 | Up |
| 172. | P52590 | Nucleoporin 107                                        | 1.19E-04 | 1.90 | Up |
| 173. | P10687 | Phospholipase C beta 1                                 | 7.60E-04 | 1.91 | Up |
| 174. | Q63449 | Progesterone receptor                                  | 4.92E-03 | 2.00 | Up |
| 175. | O08816 | Wiskott-Aldrich syndrome-like (human)                  | 3.85E-04 | 2.07 | Up |
| 176. | P55146 | TYRO3 protein tyrosine kinase                          | 1.11E-04 | 2.10 | Up |
| 177. | P21571 | ATP synthase peripheral stalk subunit F6               | 4.25E-04 | 2.12 | Up |
| 178. | O88797 | DAB2, clathrin adaptor protein                         | 3.84E-04 | 2.15 | Up |
| 179. | P61751 | ADP ribosylation factor 4                              | 1.78E-04 | 2.16 | Up |
| 180. | Q63120 | ATP binding cassette subfamily C member 2              | 6.08E-05 | 2.20 | Up |
| 181. | P11506 | Atpase plasma membrane Ca2+ transporting 2             | 3.37E-02 | 2.22 | Up |
| 182. | Q66H89 | Centrosomal protein 83                                 | 1.17E-02 | 2.26 | Up |
| 183. | Q6P9T8 | Tubulin beta 4B class ivb                              | 1.21E-03 | 2.28 | Up |
| 184. | Q5BK63 | NADH:ubiquinone oxidoreductase subunit A9              | 4.72E-02 | 2.28 | Up |
| 185. | O08839 | Bridging integrator 1                                  | 8.86E-03 | 2.30 | Up |
| 186. | P62944 | Adaptor related protein complex 2 subunit beta 1       | 1.75E-02 | 2.38 | Up |
| 187. | P38652 | Phosphoglucomutase 1                                   | 2.11E-02 | 2.61 | Up |
| 188. | P13444 | Methionine adenosyltransferase 1A                      | 8.14E-03 | 3.27 | Up |
| 189. | P84087 | Complexin 2                                            | 3.73E-03 | 3.37 | Up |
| 190. | P35281 | RAB10, member RAS oncogene family                      | 1.93E-02 | 4.45 | Up |
| 191. | P35434 | ATP synthase F1 subunit delta                          | 3.29E-02 | 4.78 | Up |

|      |        |                             |          |        |    |
|------|--------|-----------------------------|----------|--------|----|
| 192. | P06399 | Fibrinogen alpha chain      | 2.17E-03 | 11.22  | Up |
| 193. | Q63228 | Glia maturation factor beta | 5.18E-05 | 500.00 | Up |

| MUSCLE |        |                                                                              |          |          |      |
|--------|--------|------------------------------------------------------------------------------|----------|----------|------|
| 1      | O09028 | Gamma-aminobutyric acid receptor subunit pi                                  | 1.60E-04 | Infinity | Down |
| 2      | P04182 | Ornithine aminotransferase, mitochondrial                                    | 5.09E-03 | 3.07     | Down |
| 3      | Q63518 | Myosin-binding protein C, slow-type (Fragment)                               | 6.82E-03 | 2.77     | Down |
| 4      | P27605 | Hypoxanthine-guanine phosphoribosyltransferase                               | 1.12E-02 | Infinity | Down |
| 5      | Q6AY17 | Protein ABHD17B                                                              | 1.51E-02 | 3.04     | Down |
| 6      | P10719 | ATP synthase subunit beta, mitochondrial                                     | 1.57E-02 | 31.84    | Down |
| 7      | Q63639 | Retinal dehydrogenase 2                                                      | 1.78E-02 | 12.13    | Down |
| 8      | Q9QX79 | Fetuin-B                                                                     | 2.82E-02 | 253.41   | Down |
| 9      | Q29RW1 | Myosin-4                                                                     | 3.51E-02 | 1.52     | Down |
| 10     | P02093 | Hemoglobin subunit beta                                                      | 3.79E-04 | Infinity | UP   |
| 11     | P31977 | Ezrin                                                                        | 4.01E-04 | Infinity | UP   |
| 12     | Q63342 | Dimethylglycine dehydrogenase, mitochondrial                                 | 4.44E-04 | 11.46    | UP   |
| 13     | Q561S0 | NADH dehydrogenase [ubiquinone] 1 alpha subcomplex subunit 10, mitochondrial | 6.69E-04 | Infinity | UP   |
| 14     | P21575 | Dynamin-1                                                                    | 6.90E-04 | Infinity | UP   |
| 15     | O35244 | Peroxiredoxin-6                                                              | 1.02E-03 | 9.41     | UP   |
| 16     | Q7TP54 | Rho family-interacting cell polarization regulator 2                         | 1.66E-03 | 367.84   | UP   |
| 17     | Q6UPE1 | Electron transfer flavoprotein-ubiquinone oxidoreductase, mitochondrial      | 1.85E-03 | 236.12   | UP   |
| 18     | P20059 | Hemopexin                                                                    | 2.71E-03 | 779.02   | UP   |
| 19     | P08011 | Microsomal glutathione S-transferase 1                                       | 4.90E-03 | 2.22     | UP   |
| 20     | P21775 | 3-ketoacyl-CoA thiolase A, peroxisomal                                       | 5.79E-03 | 1.92     | UP   |
| 21     | P52873 | Pyruvate carboxylase, mitochondrial                                          | 6.01E-03 | 4.34     | UP   |
| 22     | Q8VHF5 | Citrate synthase, mitochondrial                                              | 7.10E-03 | 2.54     | UP   |
| 23     | Q68FT3 | Pyridine nucleotide-disulfide oxidoreductase domain-containing protein 2     | 7.26E-03 | 2.20     | UP   |
| 24     | P38983 | 40S ribosomal protein SA                                                     | 7.35E-03 | Infinity | UP   |
| 25     | Q99NA5 | Isocitrate dehydrogenase [NAD] subunit alpha, mitochondrial                  | 8.96E-03 | 378.68   | UP   |
| 26     | Q4FZR5 | Adrenocortical dysplasia protein homolog                                     | 8.96E-03 | Infinity | UP   |
| 27     | P07633 | Propionyl-CoA carboxylase beta chain, mitochondrial                          | 9.21E-03 | Infinity | UP   |
| 28     | P05182 | Cytochrome P450 2E1                                                          | 9.75E-03 | 1.66     | UP   |
| 29     | Q9Z1P2 | Alpha-actinin-1                                                              | 1.04E-02 | 1.63     | UP   |
| 30     | P11598 | Protein disulfide-isomerase A3                                               | 1.68E-02 | Infinity | UP   |
| 31     | A0JPQ4 | Tripartite motif-containing protein 72                                       | 1.74E-02 | 6.99     | UP   |
| 32     | Q6IFX1 | Keratin, type I cytoskeletal 24                                              | 1.75E-02 | 2.34     | UP   |
| 33     | P63102 | 14-3-3 protein zeta/delta                                                    | 2.26E-02 | 9.12     | UP   |
| 34     | P62755 | 40S ribosomal protein S6                                                     | 2.46E-02 | 11.25    | UP   |
| 35     | P63018 | Heat shock cognate 71 kDa protein                                            | 3.01E-02 | 1.81     | UP   |
| 36     | P13676 | Acylamino-acid-releasing enzyme                                              | 3.24E-02 | Infinity | UP   |

|    |        |                                                          |          |          |    |
|----|--------|----------------------------------------------------------|----------|----------|----|
| 37 | Q6UPE0 | Choline dehydrogenase, mitochondrial                     | 4.11E-02 | Infinity | UP |
| 38 | Q9Z270 | Vesicle-associated membrane protein-associated protein A | 4.59E-02 | Infinity | UP |
| 39 | Q6P7D4 | Cytochrome P450 20A1                                     | 4.85E-02 | Infinity | UP |

|     |        |                                                                    |          |       |      |
|-----|--------|--------------------------------------------------------------------|----------|-------|------|
|     | LIVER  |                                                                    |          |       |      |
| 1.  | O08839 | Bridging integrator 1                                              | 6.87E-04 | 54.51 | Down |
| 2.  | O70453 | Heme oxygenase (decycling) 2, pseudogene 1                         | 2.59E-04 | 44.96 | Down |
| 3.  | P01161 | Natriuretic peptide A                                              | 2.10E-05 | 42.90 | Down |
| 4.  | Q9QZ76 | Myoglobin                                                          | 1.26E-05 | 35.49 | Down |
| 5.  | P03957 | Matrix metalloproteinase 3                                         | 4.67E-06 | 33.16 | Down |
| 6.  | Q9Z1P2 | Actinin alpha 1                                                    | 1.38E-07 | 30.77 | Down |
| 7.  | P37136 | Acetylcholinesterase (Cartwright blood group)                      | 3.79E-04 | 30.68 | Down |
| 8.  | P02563 | Myosin heavy chain 6                                               | 7.88E-06 | 27.98 | Down |
| 9.  | P04692 | Tropomyosin 1, alpha                                               | 7.03E-05 | 24.37 | Down |
| 10. | P23693 | Troponin I3, cardiac type                                          | 1.57E-04 | 23.21 | Down |
| 11. | P62632 | Eukaryotic translation elongation factor 1 alpha 2                 | 4.56E-05 | 18.99 | Down |
| 12. | Q5BK63 | NADH:ubiquinone oxidoreductase subunit A9                          | 1.11E-02 | 16.32 | Down |
| 13. | P04276 | GC, vitamin D binding protein                                      | 1.04E-04 | 12.88 | Down |
| 14. | P50753 | Troponin T2, cardiac type                                          | 2.79E-05 | 12.54 | Down |
| 15. | P02564 | Myosin heavy chain 7                                               | 1.26E-04 | 10.56 | Down |
| 16. | P47858 | Phosphofructokinase, muscle                                        | 2.44E-04 | 10.18 | Down |
| 17. | Q68FT1 | Coenzyme Q9                                                        | 1.07E-02 | 9.69  | Down |
| 18. | Q7TP90 | Arrestin domain containing 4                                       | 1.01E-02 | 9.37  | Down |
| 19. | P62882 | G protein subunit beta 5                                           | 5.76E-07 | 8.23  | Down |
| 20. | P16409 | Myosin light chain 3                                               | 1.60E-06 | 7.91  | Down |
| 21. | Q9JHZ4 | GRIP1 associated protein 1                                         | 2.90E-05 | 7.19  | Down |
| 22. | P07483 | Fatty acid binding protein 3                                       | 1.35E-05 | 7.10  | Down |
| 23. | P20788 | Ubiquinol-cytochrome c reductase, Rieske iron-sulfur polypeptide 1 | 2.44E-03 | 7.03  | Down |
| 24. | P26284 | Pyruvate dehydrogenase E1 alpha 1 subunit                          | 5.42E-04 | 6.35  | Down |
| 25. | P09634 | Homeobox A7                                                        | 1.46E-02 | 6.16  | Down |
| 26. | P12075 | Cytochrome c oxidase subunit 5B                                    | 6.75E-04 | 5.17  | Down |
| 27. | P24090 | Alpha 2-HS glycoprotein                                            | 3.65E-03 | 4.94  | Down |
| 28. | P42123 | Lactate dehydrogenase B                                            | 3.07E-04 | 4.78  | Down |
| 29. | P09605 | Creatine kinase, mitochondrial 2                                   | 3.82E-05 | 4.68  | Down |
| 30. | P70580 | Progesterone receptor membrane component 1                         | 4.86E-02 | 4.65  | Down |
| 31. | P11980 | Pyruvate kinase M1/2                                               | 3.53E-04 | 4.52  | Down |
| 32. | P08733 | Myosin light chain 2                                               | 2.17E-05 | 4.39  | Down |
| 33. | Q9Z244 | Guanosine monophosphate reductase                                  | 3.39E-04 | 3.80  | Down |
| 34. | Q5I0E8 | Kinesin family member 22                                           | 3.68E-02 | 3.68  | Down |
| 35. | P23928 | Crystallin alpha B                                                 | 4.07E-08 | 3.65  | Down |
| 36. | P11240 | Cytochrome c oxidase subunit 5A                                    | 1.21E-03 | 3.64  | Down |
| 37. | Q62920 | PDZ and LIM domain 5                                               | 3.86E-03 | 3.42  | Down |
| 38. | Q9WUH4 | Four and a half LIM domains 1                                      | 5.74E-05 | 3.37  | Down |
| 39. | Q62658 | FK506 binding protein 1A                                           | 7.81E-04 | 3.36  | Down |
| 40. | P05065 | Aldolase, fructose-bisphosphate A                                  | 9.36E-06 | 3.29  | Down |
| 41. | P62898 | Cytochrome c, somatic                                              | 1.26E-03 | 3.18  | Down |
| 42. | Q5XIE6 | 3-hydroxyisobutyryl-coa hydrolase                                  | 2.44E-03 | 3.18  | Down |
| 43. | Q6AYN4 | Phytanoyl-coa 2-hydroxylase interacting protein like               | 2.93E-02 | 3.17  | Down |
| 44. | Q9ER34 | Aconitase 2                                                        | 3.85E-04 | 3.16  | Down |
| 45. | P14046 | Murinoglobulin 1                                                   | 1.82E-03 | 2.99  | Down |

|     |        |                                                                            |          |      |      |
|-----|--------|----------------------------------------------------------------------------|----------|------|------|
| 46. | P19234 | NADH:ubiquinone oxidoreductase core subunit V2                             | 2.58E-03 | 2.98 | Down |
| 47. | P68511 | Tyrosine 3-monooxygenase/tryptophan 5-monooxygenase activation protein eta | 1.09E-02 | 2.92 | Down |
| 48. | Q6AY17 | Abhydrolase domain containing 17B                                          | 2.41E-03 | 2.87 | Down |
| 49. | Q6AYT0 | Crystallin zeta                                                            | 1.06E-02 | 2.78 | Down |
| 50. | O35115 | Four and a half LIM domains 2                                              | 3.84E-02 | 2.70 | Down |
| 51. | Q99NA5 | Isocitrate dehydrogenase 3 (NAD(+)) alpha                                  | 4.33E-04 | 2.66 | Down |
| 52. | P85972 | Vinculin                                                                   | 1.27E-03 | 2.65 | Down |
| 53. | P97584 | Prostaglandin reductase 1                                                  | 1.34E-02 | 2.56 | Down |
| 54. | P58775 | Tropomyosin 2, beta                                                        | 1.10E-02 | 2.53 | Down |
| 55. | P17425 | 3-hydroxy-3-methylglutaryl-coa synthase 1                                  | 7.34E-04 | 2.46 | Down |
| 56. | B0BNE5 | Esterase D                                                                 | 1.21E-02 | 2.44 | Down |
| 57. | Q4FZR5 | ACD, shelterin complex subunit and telomerase recruitment factor           | 4.30E-02 | 2.43 | Down |
| 58. | P00564 | Creatine kinase, M-type                                                    | 1.99E-04 | 2.36 | Down |
| 59. | P13108 | Cytochrome P450, family 2, subfamily d, polypeptide 22                     | 1.29E-03 | 2.35 | Down |
| 60. | P31000 | Vimentin                                                                   | 2.52E-03 | 2.30 | Down |
| 61. | Q6IG12 | Keratin 7                                                                  | 1.37E-03 | 2.29 | Down |
| 62. | P16638 | ATP citrate lyase                                                          | 3.49E-03 | 2.25 | Down |
| 63. | P53534 | Glycogen phosphorylase B                                                   | 8.81E-04 | 2.22 | Down |
| 64. | P19643 | Monoamine oxidase B                                                        | 2.42E-04 | 2.20 | Down |
| 65. | O55171 | Acyl-coa thioesterase 2                                                    | 4.56E-04 | 2.13 | Down |
| 66. | P14668 | Annexin A5                                                                 | 1.24E-02 | 2.06 | Down |
| 67. | P09495 | Tropomyosin 4                                                              | 4.72E-02 | 2.05 | Down |
| 68. | Q8VHF5 | Citrate synthase                                                           | 5.84E-04 | 1.99 | Down |
| 69. | P13413 | Troponin I1, slow skeletal type                                            | 3.80E-04 | 1.99 | Down |
| 70. | P10867 | Gulonolactone (L-) oxidase                                                 | 3.71E-03 | 1.97 | Down |
| 71. | Q6IFX1 | Keratin 24                                                                 | 2.48E-03 | 1.94 | Down |
| 72. | P19488 | UDP glucuronosyltransferase family 2 member B15                            | 2.82E-04 | 1.91 | Down |
| 73. | Q8CG45 | Aldo-keto reductase family 7 member A2                                     | 6.84E-05 | 1.91 | Down |
| 74. | P17209 | Myosin light chain 4                                                       | 1.99E-02 | 1.90 | Down |
| 75. | P09875 | UDP glucuronosyltransferase family 2 member B17                            | 2.77E-02 | 1.88 | Down |
| 76. | Q7TP54 | RHO family interacting cell polarization regulator 2                       | 3.99E-02 | 1.87 | Down |
| 77. | Q64565 | Alanine--glyoxylate aminotransferase 2                                     | 1.83E-03 | 1.86 | Down |
| 78. | Q05962 | Solute carrier family 25 member 4                                          | 5.72E-04 | 1.85 | Down |
| 79. | Q09073 | Solute carrier family 25 member 5                                          | 5.72E-04 | 1.85 | Down |
| 80. | P19633 | Calsequestrin 1                                                            | 3.64E-02 | 1.80 | Down |
| 81. | P62828 | RAN, member RAS oncogene family                                            | 4.25E-03 | 1.80 | Down |
| 82. | P70470 | Lysophospholipase I                                                        | 2.91E-02 | 1.79 | Down |
| 83. | Q8VIH3 | Solute carrier family 28 member 3                                          | 3.14E-03 | 1.78 | Down |
| 84. | Q06647 | ATP synthase peripheral stalk subunit OSCP                                 | 3.38E-02 | 1.76 | Down |
| 85. | P29418 | ATP synthase, H+ transporting, mitochondrial F1 complex, epsilon subunit   | 3.14E-02 | 1.76 | Down |
| 86. | P02600 | Myosin light chain 1                                                       | 1.05E-04 | 1.74 | Down |
| 87. | P12346 | Transferrin                                                                | 3.77E-04 | 1.72 | Down |
| 88. | Q5HZY2 | Secretion associated Ras related gtpase 1B                                 | 4.33E-02 | 1.71 | Down |
| 89. | Q5M9I5 | Ubiquinol-cytochrome c reductase hinge protein like                        | 3.03E-02 | 1.67 | Down |
| 90. | P06761 | Heat shock protein family A (Hsp70) member 5                               | 1.10E-02 | 1.66 | Down |
| 91. | Q63108 | Carboxylesterase 1E                                                        | 9.86E-03 | 1.66 | Down |
| 92. | P56571 | Glutamine amidotransferase like class 1 domain containing 3A               | 8.95E-04 | 1.65 | Down |
| 93. | P09812 | Glycogen phosphorylase, muscle associated                                  | 2.26E-02 | 1.65 | Down |
| 94. | P49432 | Pyruvate dehydrogenase E1 beta subunit                                     | 9.12E-05 | 1.61 | Down |
| 95. | P08009 | Glutathione S-transferase mu 2                                             | 1.95E-04 | 1.59 | Down |
| 96. | P62703 | Ribosomal protein S4 Y-linked 1                                            | 3.72E-02 | 1.58 | Down |

|      |        |                                                         |          |      |      |
|------|--------|---------------------------------------------------------|----------|------|------|
| 97.  | Q66HF1 | NADH:ubiquinone oxidoreductase core subunit S1          | 1.99E-02 | 1.55 | Down |
| 98.  | Q8CHM7 | 2-hydroxyacyl-coa lyase 1                               | 1.07E-02 | 1.52 | Down |
| 99.  | Q4G064 | Coenzyme Q5, methyltransferase                          | 2.46E-02 | 1.51 | UP   |
| 100. | P50463 | Cysteine and glycine rich protein 3                     | 2.83E-06 | 1.54 | UP   |
| 101. | Q66HS7 | PDZ and LIM domain 3                                    | 7.96E-09 | 1.58 | UP   |
| 102. | Q5I0P2 | Glycine cleavage system protein H                       | 4.79E-02 | 1.51 | UP   |
| 103. | P31210 | Aldo-keto reductase family 1 member D1                  | 2.49E-02 | 1.51 | UP   |
| 104. | P18886 | Carnitine palmitoyltransferase 2                        | 1.24E-02 | 1.51 | UP   |
| 105. | Q6AYQ2 | Aldo-keto reductase family 1 member C2                  | 9.61E-03 | 1.51 | UP   |
| 106. | P57113 | Glutathione S-transferase zeta 1                        | 8.24E-03 | 1.52 | UP   |
| 107. | P05179 | Cytochrome P450 family 2 subfamily C member 8           | 1.11E-02 | 1.53 | UP   |
| 108. | Q9WVK7 | Hydroxyacyl-coa dehydrogenase                           | 1.36E-02 | 1.53 | UP   |
| 109. | Q498T9 | Leucine rich repeat containing 8 VRAC subunit C         | 4.37E-02 | 1.54 | UP   |
| 110. | P0C2X9 | Aldehyde dehydrogenase 4 family member A1               | 3.98E-02 | 1.54 | UP   |
| 111. | P62250 | Ribosomal protein S16                                   | 4.57E-02 | 1.54 | UP   |
| 112. | O70257 | Syntaxin 7                                              | 3.57E-02 | 1.55 | UP   |
| 113. | P04903 | Glutathione S-transferase alpha 5                       | 4.80E-04 | 1.56 | UP   |
| 114. | P15149 | Cytochrome P450, family 2, subfamily a, polypeptide 12  | 1.12E-02 | 1.57 | UP   |
| 115. | P35435 | ATP synthase F1 subunit gamma                           | 9.66E-04 | 1.57 | UP   |
| 116. | Q8VID1 | Dehydrogenase/reductase 4                               | 2.11E-02 | 1.58 | UP   |
| 117. | P32755 | 4-hydroxyphenylpyruvate dioxygenase                     | 6.24E-03 | 1.59 | UP   |
| 118. | P04785 | Prolyl 4-hydroxylase subunit beta                       | 1.05E-02 | 1.59 | UP   |
| 119. | P07896 | Enoyl-coa hydratase and 3-hydroxyacyl coa dehydrogenase | 3.68E-02 | 1.59 | UP   |
| 120. | P62963 | Profilin 1                                              | 4.86E-02 | 1.59 | UP   |
| 121. | P00388 | Cytochrome p450 oxidoreductase                          | 2.46E-03 | 1.61 | UP   |
| 122. | P38659 | Protein disulfide isomerase family A member 4           | 2.36E-02 | 1.61 | UP   |
| 123. | P14408 | Fumarate hydratase                                      | 3.31E-03 | 1.62 | UP   |
| 124. | Q66HC9 | Dynein axonemal intermediate chain 2                    | 8.70E-03 | 1.62 | UP   |
| 125. | P08430 | UDP glucuronosyltransferase family 1 member A6          | 3.19E-03 | 1.62 | UP   |
| 126. | P02692 | Fatty acid binding protein 1                            | 1.02E-03 | 1.63 | UP   |
| 127. | P04462 | Myosin heavy chain 8                                    | 1.99E-04 | 1.63 | UP   |
| 128. | P36511 | UDP glucuronosyltransferase family 2 member B7          | 2.35E-02 | 1.63 | UP   |
| 129. | Q02974 | Ketohexokinase                                          | 3.43E-02 | 1.63 | UP   |
| 130. | P62738 | Actin, alpha 2, smooth muscle, aorta                    | 2.43E-02 | 1.63 | UP   |
| 131. | Q68FT5 | Betaine--homocysteine S-methyltransferase 2             | 2.75E-02 | 1.64 | UP   |
| 132. | P00884 | Aldolase, fructose-bisphosphate B                       | 5.88E-03 | 1.65 | UP   |
| 133. | P07943 | Aldo-keto reductase family 1 member B                   | 1.32E-04 | 1.65 | UP   |
| 134. | O88267 | Acyl-coa thioesterase 1                                 | 2.40E-02 | 1.66 | UP   |
| 135. | Q66HD0 | Heat shock protein 90 beta family member 1              | 2.49E-02 | 1.67 | UP   |
| 136. | P28492 | Glutaminase 2                                           | 7.99E-05 | 1.68 | UP   |
| 137. | Q6P9T8 | Tubulin beta 4B class ivb                               | 4.37E-02 | 1.70 | UP   |
| 138. | P28037 | Aldehyde dehydrogenase 1 family member L1               | 3.40E-03 | 1.70 | UP   |
| 139. | P10860 | Glutamate dehydrogenase 1                               | 1.32E-03 | 1.71 | UP   |
| 140. | Q9Z1B2 | Glutathione S-transferase mu 3                          | 1.57E-02 | 1.72 | UP   |
| 141. | P09034 | Argininosuccinate synthase 1                            | 1.29E-03 | 1.75 | UP   |
| 142. | P07756 | Carbamoyl-phosphate synthase 1                          | 4.51E-02 | 1.75 | UP   |
| 143. | P10633 | Cytochrome P450, family 2, subfamily d, polypeptide 1   | 2.55E-03 | 1.75 | UP   |
| 144. | Q03346 | Peptidase, mitochondrial processing beta subunit        | 2.90E-02 | 1.75 | UP   |
| 145. | P11345 | Raf-1 proto-oncogene, serine/threonine kinase           | 1.25E-02 | 1.76 | UP   |
| 146. | P12847 | Myosin heavy chain 3                                    | 5.98E-05 | 1.77 | UP   |
| 147. | Q6AXY0 | Glutathione S-transferase alpha 2                       | 1.06E-03 | 1.77 | UP   |

|      |        |                                                                |          |      |    |
|------|--------|----------------------------------------------------------------|----------|------|----|
| 148. | Q68FY0 | Ubiquinol-cytochrome c reductase core protein 1                | 1.99E-02 | 1.78 | UP |
| 149. | Q03248 | Beta-ureidopropionase 1                                        | 7.13E-05 | 1.79 | UP |
| 150. | P35738 | Branched chain keto acid dehydrogenase E1 subunit beta         | 3.98E-02 | 1.79 | UP |
| 151. | P51635 | Aldo-keto reductase family 1 member A1                         | 4.41E-02 | 1.80 | UP |
| 152. | P62083 | Ribosomal protein S7                                           | 2.00E-04 | 1.81 | UP |
| 153. | P17988 | Sulfotransferase family 1A, phenol-preferring, member 1        | 1.25E-02 | 1.82 | UP |
| 154. | P35859 | Insulin like growth factor binding protein acid labile subunit | 3.28E-02 | 1.82 | UP |
| 155. | P08541 | UDP glucuronosyltransferase family 2 member B28                | 1.01E-02 | 1.84 | UP |
| 156. | P23457 | Aldo-keto reductase family 1, member C14                       | 2.52E-02 | 1.85 | UP |
| 157. | Q71UF4 | RB binding protein 7, chromatin remodeling factor              | 6.08E-03 | 1.86 | UP |
| 158. | P97562 | Acyl-coa oxidase 2                                             | 1.02E-03 | 1.86 | UP |
| 159. | P62832 | Ribosomal protein L23                                          | 7.38E-03 | 1.86 | UP |
| 160. | Q5M9H0 | Ankyrin repeat and sterile alpha motif domain containing 3     | 3.55E-02 | 1.88 | UP |
| 161. | Q9ES39 | Nude neurodevelopment protein 1                                | 1.67E-04 | 1.88 | UP |
| 162. | B0BNN3 | Carbonic anhydrase 1                                           | 6.75E-03 | 1.89 | UP |
| 163. | Q63276 | Bile acid-coa:amino acid N-acyltransferase                     | 9.36E-03 | 1.89 | UP |
| 164. | P50237 | Sulfotransferase family 1C member 3                            | 1.96E-02 | 1.89 | UP |
| 165. | P00684 | Ribonuclease A family member 1, pancreatic                     | 6.90E-06 | 1.90 | UP |
| 166. | Q5XIL2 | Phosphatidylinositol 4-kinase type 2 beta                      | 4.82E-02 | 1.90 | UP |
| 167. | Q07116 | Sulfite oxidase                                                | 2.01E-02 | 1.90 | UP |
| 168. | P62630 | Eukaryotic translation elongation factor 1 alpha 1             | 1.73E-02 | 1.91 | UP |
| 169. | P62271 | Ribosomal protein S18                                          | 4.37E-03 | 1.93 | UP |
| 170. | P62902 | Ribosomal protein L31                                          | 3.35E-02 | 1.93 | UP |
| 171. | P97521 | Solute carrier family 25 member 20                             | 1.39E-03 | 1.93 | UP |
| 172. | Q9JLJ3 | Aldehyde dehydrogenase 9 family member A1                      | 3.18E-05 | 1.96 | UP |
| 173. | P22791 | 3-hydroxy-3-methylglutaryl-coa synthase 2                      | 9.25E-03 | 1.99 | UP |
| 174. | P13444 | Methionine adenosyltransferase 1A                              | 3.65E-03 | 1.99 | UP |
| 175. | P25093 | Fumarylacetoacetate hydrolase                                  | 9.39E-04 | 2.00 | UP |
| 176. | P07308 | Stearoyl-coa desaturase                                        | 3.97E-02 | 2.04 | UP |
| 177. | O09171 | Betaine--homocysteine S-methyltransferase                      | 1.65E-03 | 2.04 | UP |
| 178. | P09811 | Glycogen phosphorylase L                                       | 4.88E-03 | 2.04 | UP |
| 179. | Q6AYS8 | Hydroxysteroid 17-beta dehydrogenase 11                        | 3.17E-03 | 2.05 | UP |
| 180. | P10760 | Adenosylhomocysteinase                                         | 1.43E-02 | 2.09 | UP |
| 181. | P41123 | Ribosomal protein L13                                          | 4.80E-02 | 2.11 | UP |
| 182. | Q76MX4 | MAF bzip transcription factor G                                | 7.46E-03 | 2.12 | UP |
| 183. | O35077 | Glycerol-3-phosphate dehydrogenase 1                           | 3.95E-04 | 2.13 | UP |
| 184. | Q5PPL3 | NAD(P) dependent steroid dehydrogenase-like                    | 1.12E-02 | 2.17 | UP |
| 185. | P51652 | Aldo-keto reductase family 1 member C3                         | 7.52E-03 | 2.18 | UP |
| 186. | P0DMW0 | Heat shock protein family A (Hsp70) member 1A                  | 3.63E-02 | 2.20 | UP |
| 187. | Q68FS4 | Leucine aminopeptidase 3                                       | 5.39E-04 | 2.22 | UP |
| 188. | P46418 | Glutathione S-transferase alpha 3                              | 1.52E-04 | 2.27 | UP |
| 189. | Q63707 | Dihydroorotate dehydrogenase (quinone)                         | 4.18E-03 | 2.28 | UP |
| 190. | P51653 | Glypican 2                                                     | 4.23E-02 | 2.29 | UP |
| 191. | Q8R426 | Potassium voltage-gated channel interacting protein 1          | 8.80E-03 | 2.30 | UP |
| 192. | P21396 | Monoamine oxidase A                                            | 2.28E-03 | 2.30 | UP |
| 193. | P07895 | Superoxide dismutase 2                                         | 4.23E-06 | 2.35 | UP |
| 194. | Q6P6G5 | Yip1 domain family member 1                                    | 3.21E-02 | 2.36 | UP |
| 195. | P16036 | Solute carrier family 25 member 3                              | 7.42E-05 | 2.37 | UP |
| 196. | P07872 | Acyl-coa oxidase 1                                             | 1.40E-04 | 2.39 | UP |
| 197. | Q63041 | PZP, alpha-2-macroglobulin like                                | 6.01E-03 | 2.39 | UP |
| 198. | P50398 | GDP dissociation inhibitor 1                                   | 2.94E-04 | 2.39 | UP |

|      |        |                                                              |          |      |    |
|------|--------|--------------------------------------------------------------|----------|------|----|
| 199. | Q4KLZ6 | Triokinase and FMN cyclase                                   | 2.81E-03 | 2.40 | UP |
| 200. | Q5XIJ8 | Coiled-coil domain containing 65                             | 1.40E-02 | 2.42 | UP |
| 201. | O70142 | SHC adaptor protein 2                                        | 5.44E-03 | 2.50 | UP |
| 202. | Q561R7 | General transcription factor IIH subunit 3                   | 1.31E-02 | 2.51 | UP |
| 203. | P04904 | Glutathione S-transferase alpha 1                            | 3.21E-05 | 2.51 | UP |
| 204. | Q5XIH4 | Lipoic acid synthetase                                       | 3.75E-03 | 2.60 | UP |
| 205. | P05178 | Cytochrome P450 family 2 subfamily C member 19               | 5.27E-04 | 2.64 | UP |
| 206. | A0JPI9 | Leucine rich repeat containing 74A                           | 2.78E-04 | 2.66 | UP |
| 207. | P70473 | Alpha-methylacyl-coa racemase                                | 9.72E-04 | 2.69 | UP |
| 208. | P19112 | Fructose-bisphosphatase 1                                    | 9.32E-05 | 2.74 | UP |
| 209. | P52873 | Pyruvate carboxylase                                         | 7.44E-03 | 2.74 | UP |
| 210. | Q63610 | Tropomyosin 3                                                | 1.31E-02 | 2.75 | UP |
| 211. | O08700 | Vacuolar protein sorting 45 homolog                          | 4.38E-03 | 2.82 | UP |
| 212. | P09606 | Glutamate-ammonia ligase                                     | 2.58E-03 | 2.83 | UP |
| 213. | Q9ES08 | Potassium two pore domain channel subfamily K member 9       | 1.82E-02 | 2.86 | UP |
| 214. | P82995 | Heat shock protein 90 alpha family class A member 1          | 1.66E-03 | 2.89 | UP |
| 215. | Q9Z158 | Syntaxin 17                                                  | 1.90E-03 | 3.07 | UP |
| 216. | P01048 | Kininogen 2                                                  | 1.07E-02 | 3.25 | UP |
| 217. | P62425 | Ribosomal protein 17a                                        | 6.37E-05 | 3.26 | UP |
| 218. | P13255 | Glycine N-methyltransferase                                  | 5.49E-04 | 3.33 | UP |
| 219. | Q5FVR5 | Acyl-coenzyme A amino acid N-acyltransferase 2               | 6.21E-04 | 3.34 | UP |
| 220. | Q4QQS8 | Nucleoporin 85                                               | 4.31E-03 | 3.53 | UP |
| 221. | Q63279 | Keratin 19                                                   | 8.30E-06 | 3.73 | UP |
| 222. | P14200 | Pro-melanin concentrating hormone                            | 3.33E-02 | 3.85 | UP |
| 223. | P04166 | Cytochrome b5 type B                                         | 3.66E-05 | 4.05 | UP |
| 224. | Q9ESV6 | Glyceraldehyde-3-phosphate dehydrogenase, spermatogenic      | 2.74E-05 | 4.31 | UP |
| 225. | P11960 | Branched chain keto acid dehydrogenase E1, alpha polypeptide | 2.51E-05 | 5.10 | UP |
| 226. | Q63250 | Forkhead box E3                                              | 2.95E-04 | 6.38 | UP |
| 227. | Q68FX6 | Calcium binding protein, spermatid associated 1              | 9.20E-05 | 8.01 | UP |
| 228. | P52847 | Sulfotransferase family 1B member 1                          | 1.25E-06 | 8.42 | UP |

| Kidney |        |                                                                              |          |       |      |
|--------|--------|------------------------------------------------------------------------------|----------|-------|------|
| 1.     | P21571 | ATP synthase peripheral stalk subunit F6                                     | 1.72E-02 | 6.448 | Down |
| 2.     | Q63633 | Solute carrier family 12 member 5                                            | 1.08E-02 | 3.341 | Down |
| 3.     | Q794F9 | 4F2 cell-surface antigen heavy chain                                         | 7.85E-04 | 3.324 | Down |
| 4.     | P22072 | Hydroxy-delta-5-steroid dehydrogenase, 3 beta- and steroid delta-isomerase 2 | 1.60E-02 | 2.294 | Down |
| 5.     | P27364 | NADPH-dependent 3-keto-steroid reductase Hsd3b5                              | 4.15E-03 | 2.242 | Down |
| 6.     | Q920P0 | Dicarbonyl and L-xylulose reductase                                          | 2.06E-02 | 2.187 | Down |
| 7.     | Q6AXV4 | SAMM50 sorting and assembly machinery component                              | 1.03E-03 | 1.915 | Down |
| 8.     | P97943 | Scavenger receptor class B member 1                                          | 2.52E-03 | 1.861 | Down |
| 9.     | Q63610 | Tropomyosin 3                                                                | 5.97E-03 | 1.835 | Down |
| 10.    | P49432 | Pyruvate dehydrogenase E1 beta subunit                                       | 2.37E-02 | 1.804 | Down |
| 11.    | Q5XI32 | Capping actin protein of muscle Z-line subunit beta                          | 2.09E-02 | 1.732 | Down |
| 12.    | Q920J3 | Coronin 6                                                                    | 1.73E-02 | 1.579 | Down |
| 13.    | P20817 | Cytochrome P450, family 4, subfamily a, polypeptide 14                       | 3.08E-03 | 1.539 | Down |
| 14.    | Q63666 | Vesicle-associated membrane protein 1                                        | 3.03E-02 | 1.512 | Down |
| 15.    | P50503 | ST13, Hsp70 interacting protein                                              | 8.18E-03 | 1.501 | Down |
| 16.    | Q8R431 | Monoglyceride lipase                                                         | 8.49E-03 | 1.556 | Up   |
| 17.    | Q9Z339 | Glutathione S-transferase omega 1                                            | 8.11E-04 | 1.606 | Up   |
| 18.    | Q5M7T9 | Threonine synthase like 2                                                    | 3.77E-02 | 1.618 | Up   |

|     |        |                                                            |          |         |    |
|-----|--------|------------------------------------------------------------|----------|---------|----|
| 19. | P00481 | Ornithine carbamoyltransferase                             | 4.76E-02 | 1.621   | Up |
| 20. | Q925B5 | Synaptotagmin 13                                           | 3.64E-03 | 1.631   | Up |
| 21. | P38718 | Mitochondrial pyruvate carrier 2                           | 8.05E-03 | 1.654   | Up |
| 22. | P08009 | Glutathione S-transferase mu 2                             | 1.03E-02 | 1.754   | Up |
| 23. | P62824 | RAB3C, member RAS oncogene family                          | 9.96E-03 | 1.76    | Up |
| 24. | B0BNA5 | Coactosin like F-actin binding protein 1                   | 1.40E-03 | 1.766   | Up |
| 25. | P47853 | Biglycan                                                   | 4.44E-02 | 1.812   | Up |
| 26. | P04550 | Parathymosin                                               | 1.04E-02 | 1.892   | Up |
| 27. | P97636 | Interleukin 18                                             | 2.18E-02 | 1.927   | Up |
| 28. | P02563 | Myosin heavy chain 6                                       | 3.59E-02 | 1.935   | Up |
| 29. | P63012 | RAB3A, member RAS oncogene family                          | 2.91E-02 | 1.944   | Up |
| 30. | P04916 | Retinol binding protein 4                                  | 1.10E-02 | 1.973   | Up |
| 31. | P20761 | Immunoglobulin heavy chain 6                               | 5.85E-03 | 2.015   | Up |
| 32. | Q9JM01 | Cyclin dependent kinase like 3                             | 3.50E-02 | 2.143   | Up |
| 33. | P08010 | Glutathione S-transferase mu 1                             | 1.76E-02 | 2.152   | Up |
| 34. | Q9ESV6 | Glyceraldehyde-3-phosphate dehydrogenase, spermatogenic    | 2.69E-02 | 2.165   | Up |
| 35. | P47875 | Cysteine and glycine rich protein 1                        | 2.38E-03 | 2.236   | Up |
| 36. | P46844 | Biliverdin reductase A                                     | 1.64E-02 | 2.251   | Up |
| 37. | Q5I0C3 | Methylcrotonoyl-coa carboxylase 1                          | 4.16E-03 | 2.287   | Up |
| 38. | P47861 | Synaptotagmin 5                                            | 4.48E-02 | 2.293   | Up |
| 39. | Q66HF8 | Aldehyde dehydrogenase 1 family member B1                  | 1.36E-02 | 2.39    | Up |
| 40. | Q6AYP3 | Tetratricopeptide repeat domain 29                         | 2.90E-03 | 2.394   | Up |
| 41. | P11980 | Pyruvate kinase M1/2                                       | 1.61E-02 | 2.556   | Up |
| 42. | Q5PQN0 | Neurocalcin delta                                          | 2.98E-03 | 2.662   | Up |
| 43. | P02680 | Fibrinogen gamma chain                                     | 4.65E-02 | 3.082   | Up |
| 44. | B9TQX4 | Upper zone of growth plate and cartilage matrix associated | 1.49E-02 | 3.892   | Up |
| 45. | O89049 | Thioredoxin reductase 1                                    | 2.50E-03 | 4.011   | Up |
| 46. | P00697 | Lysozyme                                                   | 7.04E-04 | 4.372   | Up |
| 47. | P24090 | Alpha 2-HS glycoprotein                                    | 6.28E-03 | 4.52    | Up |
| 48. | P02692 | Fatty acid binding protein 1                               | 4.18E-02 | 9.349   | Up |
| 49. | Q63941 | RAB3B, member RAS oncogene family                          | 2.91E-02 | 9.755   | Up |
| 50. | P62907 | Ribosomal protein l10a                                     | 1.63E-02 | 25.781  | Up |
| 51. | P23785 | Granulin precursor                                         | 6.80E-03 | 102.361 | Up |
| 52. | Q9R1J4 | Myocilin                                                   | 1.49E-03 | 319.242 | Up |
