# Supplementary material for: Proteomic Analysis of Morphologically Changed Tissues after Prolonged Dexamethasone Treatment
Source: MDPI journal article supplement (doi:10.3390/ijms20133122), 2019-06-26
Supplement: s1 [file s1]

| <b>Table S 4</b> | Canonical Pathways                                   | -log(p-value) | Ratio  | Number of molecules | Total number of molecules |
|------------------|------------------------------------------------------|---------------|--------|---------------------|---------------------------|
| Overall          |                                                      |               |        |                     |                           |
| 1                | LPS/IL-1 Mediated Inhibition of LXR and RXR Function | 21.2          | 0.17   | 38                  | 224                       |
| 2                | Xenobiotic Metabolism Signaling                      | 20.8          | 0.142  | 43                  | 303                       |
| 3                | Serotonin Degradation                                | 16.8          | 0.284  | 21                  | 74                        |
| 4                | NRF2-mediated Oxidative Stress Response              | 14.9          | 0.146  | 30                  | 206                       |
| 5                | Mitochondrial Dysfunction                            | 14.4          | 0.158  | 27                  | 171                       |
| 6                | Dopamine Degradation                                 | 11.9          | 0.351  | 13                  | 37                        |
| Brain            |                                                      |               |        |                     |                           |
| 1                | Leucine Degradation I                                | 6.27          | 0.444  | 11                  | 206                       |
| 2                | NRF2-mediated Oxidative Stress Response              | 5.93          | 0.0534 | 5                   | 24                        |
| 3                | Glutathione Redox Reactions I                        | 5.87          | 0.208  | 12                  | 292                       |
| 4                | Sirtuin Signaling Pathway                            | 5.23          | 0.0411 | 8                   | 148                       |
| 5                | Phagosome Maturation                                 | 4.49          | 0.0541 | 4                   | 26                        |
| 6                | Glycolysis I                                         | 4.24          | 0.154  | 4                   | 26                        |
| Heart            |                                                      |               |        |                     |                           |
| 1                | LPS/IL-1 Mediated Inhibition of LXR and RXR Function | 9.02          | 0.0676 |                     |                           |
| 2                | NRF2-mediated Oxidative Stress Response              | 8.85          | 0.0725 |                     |                           |
| 3                | Xenobiotic Metabolism Signaling                      | 8.31          | 0.0552 |                     |                           |
| 4                | Glutathione-mediated Detoxification                  | 8.16          | 0.226  |                     |                           |
| 5                | Serotonin Degradation                                | 7.68          | 0.117  |                     |                           |
| 6                | Glutathione Redox Reactions I                        | 5.78          | 0.208  |                     |                           |
| Muscle           |                                                      |               |        |                     |                           |

|        |                                                      |      |            |    |     |
|--------|------------------------------------------------------|------|------------|----|-----|
| 1      | Glutathione Redox Reactions I                        | 3.01 | 0.087      | 2  | 23  |
| 2      | TCA Cycle II (Eukaryotic)                            | 3.01 | 0.087      | 2  | 23  |
| 3      | p70S6K Signaling                                     | 2.65 | 0.023<br>3 | 3  | 129 |
| 4      | Guanine and Guanosine Salvage I                      | 2.39 | 0.5        | 1  | 2   |
| 5      | Choline Degradation I                                | 2.39 | 0.5        | 1  | 2   |
| 6      | Regulation of Cellular Mechanics by Calpain Protease | 2.26 | 0.036<br>4 | 2  | 55  |
| Liver  |                                                      |      |            |    |     |
| 1      | LPS/IL-1 Mediated Inhibition of LXR and RXR Function | 16.1 | 0.104      | 15 | 77  |
| 2      | Xenobiotic Metabolism Signaling                      | 15.5 | 0.086<br>2 | 13 | 70  |
| 3      | Serotonin Degradation                                | 14.8 | 0.195      | 17 | 171 |
| 4      | Superpathway of Melatonin Degradation                | 12.6 | 0.186      | 11 | 65  |
| 5      | Mitochondrial Dysfunction                            | 11.7 | 0.099<br>4 | 8  | 37  |
| 6      | Melatonin Degradation I                              | 10.3 | 0.169      | 11 | 109 |
| Kidney |                                                      |      |            |    |     |
| 1      | LPS/IL-1 Mediated Inhibition of LXR and RXR Function | 7.32 | 0.037<br>2 | 8  | 215 |
| 2      | Glutathione-mediated Detoxification                  | 4.27 | 0.1        | 3  | 30  |
| 3      | NRF2-mediated Oxidative Stress Response              | 4.06 | 0.027      | 5  | 185 |
| 4      | LXR/RXR Activation                                   | 3.69 | 0.033<br>6 | 4  | 119 |
| 5      | FXR/RXR Activation                                   | 3.61 | 0.032      | 4  | 125 |
| 6      | Mineralocorticoid Biosynthesis                       | 3.5  | 0.182      | 2  | 11  |
